1  
2  
3  
4  
5  
6  
7  
8  
9  
10  
11  
12  
13  
14  
15  
16  
17  
18  
19

**Dual signaling via interferon and DNA damage response elicits entrapment  
by giant PML nuclear bodies**

Myriam Scherer<sup>1</sup>, Clarissa Read<sup>1,2</sup>, Gregor Neusser<sup>3</sup>, Christine Kranz<sup>3</sup>, Regina Müller<sup>4</sup>, Florian Full<sup>4</sup>, Sonja Wörz<sup>1</sup>, Anna Reichel<sup>1</sup>, Eva-Maria Schilling<sup>1</sup>, Paul Walther<sup>2</sup>, Thomas Stamminger<sup>1\*</sup>

<sup>1</sup> Institute of Virology, Ulm University Medical Center, Ulm, Germany

<sup>2</sup> Central Facility for Electron Microscopy, Ulm University, Ulm, Germany

<sup>3</sup> Institute of Analytical and Bioanalytical Chemistry, Ulm University, Ulm, Germany

<sup>4</sup> Institute of Clinical and Molecular Virology, Friedrich Alexander Universität Erlangen-Nürnberg, Erlangen, Germany

\*corresponding author

20 **ABSTRACT**

21 PML nuclear bodies (PML-NBs) are dynamic interchromosomal macromolecular complexes  
22 implicated in epigenetic regulation as well as antiviral defense. During herpesvirus infection,  
23 PML-NBs induce epigenetic silencing of viral genomes, however, this defense is antagonized  
24 by viral regulatory proteins such as IE1 of human cytomegalovirus (HCMV). Here, we show  
25 that PML-NBs undergo a drastic rearrangement into highly enlarged PML cages upon infection  
26 with IE1-deficient HCMV. Importantly, our results demonstrate that dual signaling by  
27 interferon and DNA damage response is required to elicit giant PML-NBs. DNA labeling  
28 revealed that invading HCMV genomes are entrapped inside PML-NBs and remain stably  
29 associated with PML cages in a transcriptionally repressed state. Intriguingly, by correlative  
30 light and transmission electron microscopy (EM), we observed that PML cages also entrap  
31 newly assembled viral capsids demonstrating a second defense layer in cells with incomplete  
32 first line response. Further characterization by 3D EM showed that hundreds of viral capsids  
33 are tightly packed into several layers of fibrous PML. Overall, our data indicate that giant PML-  
34 NBs arise via combined interferon and DNA damage signaling which triggers entrapment of  
35 both nucleic acids and proteinaceous components. This represents a multilayered defense  
36 strategy to act in a cytoprotective manner and to combat viral infections.

## 37 INTRODUCTION

38 In order to establish a successful infection, viruses have to overcome intrinsic, innate, and  
39 adaptive host defenses which act in a cooperative manner to block viral replication and spread.  
40 The first line of intracellular defense is provided by intrinsic immune effectors that, in contrast  
41 to classical innate responses like the interferon system, are constitutively expressed and do not  
42 require pathogen-induced activation. Studies over the last 25 years have identified  
43 promyelocytic leukemia protein nuclear bodies (PML-NBs), also known as nuclear domain 10,  
44 as key mediators of intrinsic immunity against viruses from different families <sup>1,2</sup>. These highly  
45 dynamic protein complexes are located in the interchromosomal space of the cell nucleus and  
46 appear as discrete foci with a size of 0.2 – 1.0 µm in diameter and a number of 1 – 30 PML-NBs  
47 per nucleus, depending on cell type and condition <sup>3</sup>. PML, the structure-defining component of  
48 PML-NBs, belongs to the tripartite motif (TRIM) protein family and is expressed in at least  
49 seven isoforms whose common N-terminal region consists of a RING domain, one or two B-  
50 boxes, and a coiled-coil (CC) domain. All PML isoforms are subject to covalent modification  
51 with small ubiquitin-like modifier (SUMO) proteins, which enables the recruitment of further  
52 components and is therefore essential for PML-NB biogenesis. Due to the high number of  
53 permanently or transiently recruited proteins, PML-NBs have been implicated in a variety of  
54 cellular processes including transcriptional regulation, control of apoptosis and cellular  
55 senescence as well as DNA damage response. Furthermore, the early observation that PML-  
56 NBs target invading genomes of several DNA viruses, including the herpesviruses herpes  
57 simplex virus 1 (HSV-1) and human cytomegalovirus (HCMV), papillomaviruses and  
58 adenoviruses, raised the concept that PML-NBs act as sites for deposition of viral DNA <sup>4-6</sup>.  
59 More recent research on HSV-1 has confirmed the nuclear association with parental viral  
60 genomes and has shown that HSV-1 DNA is enveloped by PML-NBs, which thereby contribute  
61 to the control of latency in infected neurons and to intrinsic restriction of lytic HSV-1 infection  
62 <sup>7-9</sup>. In contrast, a study on the interplay of PML-NBs with adenoviral genomes has found a viral

63 DNA replication factor but not genome complexes colocalizing with PML-NBs, thus arguing  
64 against a general role as deposition site for viral genomes <sup>10</sup>.

65 Characterization of the intrinsic immune function of PML-NBs during herpesvirus infection  
66 has identified the major components PML, Sp100, Daxx, and ATRX as independent restriction  
67 factors that induce epigenetic silencing of viral DNA by recruiting chromatin-modifying  
68 enzymes <sup>11</sup>. This restrictive activity enables PML-NBs to block one of the first steps in the  
69 herpesviral life cycle. However, it is saturable and can be overcome by high doses of virus. A  
70 different antiviral mechanism, acting on a later stage of infection, has been shown to affect the  
71 herpesvirus varicella-zoster virus (VZV). During VZV infection, PML-NBs target and enclose  
72 viral nucleocapsids, mediated through a specific interaction of PML isoform IV with the ORF23  
73 capsid protein <sup>12,13</sup>. In addition to their role in intrinsic immunity, accumulating evidence  
74 implicates PML-NBs in the innate immune defense. An interplay between PML-NBs and innate  
75 immunity has been discovered with the observation that interferon (IFN) treatment induces the  
76 expression of specific PML-NB factors, such as PML and Sp100, and leads to an increased size  
77 and number of foci <sup>14,15</sup>. In line with this, PML-NBs participate in the establishment of an IFN-  
78 induced antiviral state and depletion of PML reduces the capacity of IFNs to protect from viral  
79 infections <sup>16,17</sup>. Recent evidence has found that PML itself acts as a co-regulatory factor for the  
80 induction of IFN-stimulated genes, suggesting an even closer cross talk between intrinsic and  
81 innate immune mechanisms <sup>18-21</sup>.

82 In light of the broad antiviral activity of PML-NBs, it is not surprising that viruses encode  
83 antagonistic effector proteins that employ diverse strategies to inactivate single PML-NB  
84 proteins or disrupt the integrity of the whole structure. HCMV, a ubiquitous beta-herpesvirus  
85 causing serious disease in immunocompromised individuals, encodes at least two effector  
86 proteins that act in a sequential manner to efficiently antagonize PML-NB-based repression.  
87 Upon infection, the tegument-delivered protein pp71 is imported into the nucleus where it leads  
88 to dissociation of ATRX from PML-NBs, followed by proteasomal degradation of Daxx <sup>22,23</sup>.

89 As this facilitates initiation of viral immediate-early gene expression, the immediate-early  
90 protein 1 (IE1) can be expressed and induces a complete dispersal of PML-NBs within the first  
91 hours of infection. Mechanistic studies have revealed that IE1 directly interacts with PML  
92 through its all alpha-helical core domain and blocks *de novo* SUMOylation of PML, thus  
93 disrupting PML-NB integrity<sup>24</sup>. While the PML-antagonistic protein ICP0 of HSV-1 has been  
94 shown to induce a widespread degradation of SUMO-modified proteins, IE1 uses a more  
95 specific, but yet not fully elucidated mechanism to inhibit PML SUMOylation and thereby  
96 promote viral replication<sup>25</sup>. Due to such rapid and effective countermeasures, recombinant  
97 viruses that lack antagonistic proteins provide a valuable tool to study antiviral activities of  
98 cellular restriction factors, which would otherwise not be detectable.

99 Here, we report an interferon- and DNA damage signaling-induced formation of huge PML  
100 spheres, referred to as PML cages, which occurs during infection with IE1-deleted HCMV.  
101 Visualization of viral DNA with clickable fluorescent azides revealed that input HCMV  
102 genomes are entrapped by PML-NBs and remain stably encased by PML cages, leading to  
103 repression of viral gene expression as a first layer of antiviral defense. Moreover, we identify a  
104 second layer of PML-based protection for cells escaping the gene silencing-driven defense: we  
105 demonstrate that PML cages entrap newly assembled HCMV capsids in late infected cells by  
106 using correlative light and transmission electron microscopy (CLEM). 3D reconstruction of  
107 PML cages after focused ion beam-scanning electron microscopy (FIB-SEM) tomography  
108 illustrates hundreds of HCMV capsids sequestered by fibrous PML structures. Overall, these  
109 data indicate a dual, PML-based inhibition of HCMV infection and suggest entrapment of viral  
110 material as a general restriction mechanism used by PML-NBs.

111

112

## 113 **RESULTS**

### 114 **PML forms large, spherical structures after infection with IE1-deleted HCMV**

115 PML-NBs are known to associate with HCMV genomes that enter the nucleus in order to  
116 silence viral gene expression. The antiviral structures, however, are destroyed by the  
117 immediate-early protein IE1 within the first hours of infection. To characterize the repressive  
118 effects of PML-NBs further, we analyzed their role during HCMV infection in absence of the  
119 antagonistic activity of IE1. To this end, primary human foreskin fibroblast (HFF) cells were  
120 infected with wild-type HCMV, strain AD169, or previously described recombinant  
121 cytomegaloviruses harboring either a deletion of IE1 (AD169 $\Delta$ IE1) or a leucine-to-proline  
122 mutation at position 174 of IE1 that affects its structural integrity and abolishes its interaction  
123 with PML (AD169/IE1-L174P)<sup>21</sup>. In subsequent immunofluorescence analysis we observed  
124 that PML, which usually shows a diffuse, nuclear distribution in HCMV-infected cells (Fig. 1a,  
125 panel 1), localizes to unusually large, ring-like structures after infection with recombinant  
126 cytomegaloviruses (Fig. 1a, panel 2 and 3). Orthogonal views and maximum intensity  
127 projection of confocal z-series images suggested that these structures are in fact spherical with  
128 PML being present at the outer layer (Fig. 1b, c; Video 1). Since deletion and mutation of IE1  
129 resulted in the same reorganization of PML-NBs during infection, both recombinant viruses  
130 were utilized for the following experiments and exemplary results are shown. To further  
131 investigate the formation of PML spheres, we performed time-course analysis in cells infected  
132 with IE1-defective HCMV and examined the subcellular localization of PML and UL44, which  
133 is a marker for viral replication centers. As illustrated in Fig. 1d, PML-NBs were slightly  
134 enlarged at 8 hours post-infection (hpi), when compared to non-infected cells. During  
135 progression of infection, several PML foci developed into ring-like structures that were often  
136 juxtaposed to viral replication centers (Fig. 1d, panel 4 and 5). In summary, these data show  
137 that PML-NBs, when not disrupted by IE1, undergo a drastic redistribution during HCMV  
138 infection. These newly formed structures will be referred to as PML cages, since they resemble

139

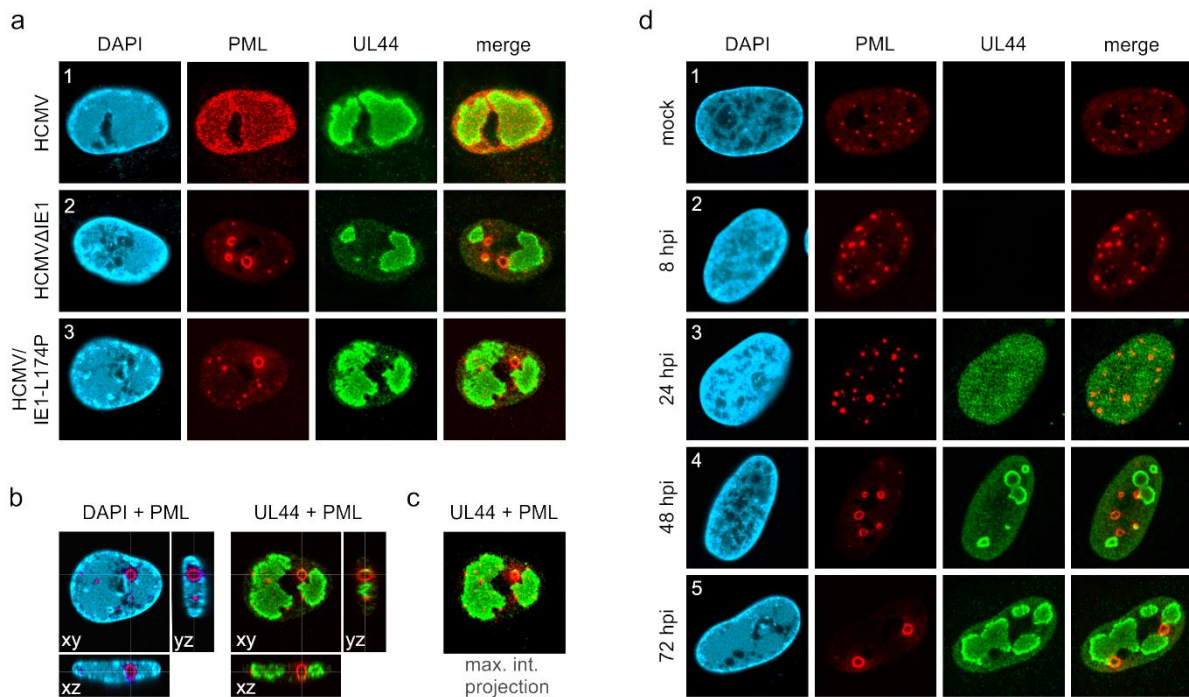

**Figure 1. Formation of PML cages during infection with IE1-deficient HCMV.** (a-c) HFF were infected with HCMV strain AD169, IE1-deleted AD169 (HCMV $\Delta$ hIE1) or AD169 encoding IE1 mutant L174P (HCMV/IE1-L174P) at a MOI of 5 IEU/cell. Cells were harvested at 72 hpi for immunofluorescence staining of endogenous PML and UL44. Orthogonal projections (b) and maximum intensity projection (c) from confocal z-series images of an HCMV/IE1-L174P-infected cell. (d) HFF were infected with HCMV/IE1-L174P (MOI 5 IEU/cell) and harvested at indicated times for immunofluorescence analysis of endogenous PML and UL44 localization. Cell nuclei were stained with DAPI.

140 enlarged PML-NBs that have been observed in patients with immunodeficiency, centromeric  
 141 instability and facial dysmorphism (ICF) syndrome or in varicella zoster virus-infected cells and  
 142 have been shown to encase cellular or viral components<sup>12,26</sup>.

143

144 **PML, but no other PML-NB component, is required for formation of PML cages**

145 Next, we set out to characterize the architecture of PML cages. For this purpose, HFF were  
 146 infected with IE1-deficient HCMV, followed by co-staining of PML and proteins that are  
 147 known to permanently reside at PML-NBs. Except for ATRX (Fig. 2a, panel 3), all main NB  
 148 components, namely Sp100, Daxx, SUMO-1, and SUMO-2/3, were detected at the rim of PML  
 149 cages indicating a similar composition to that of PML-NBs (Fig. 2a, panel 1, 2, 4, and 5). This

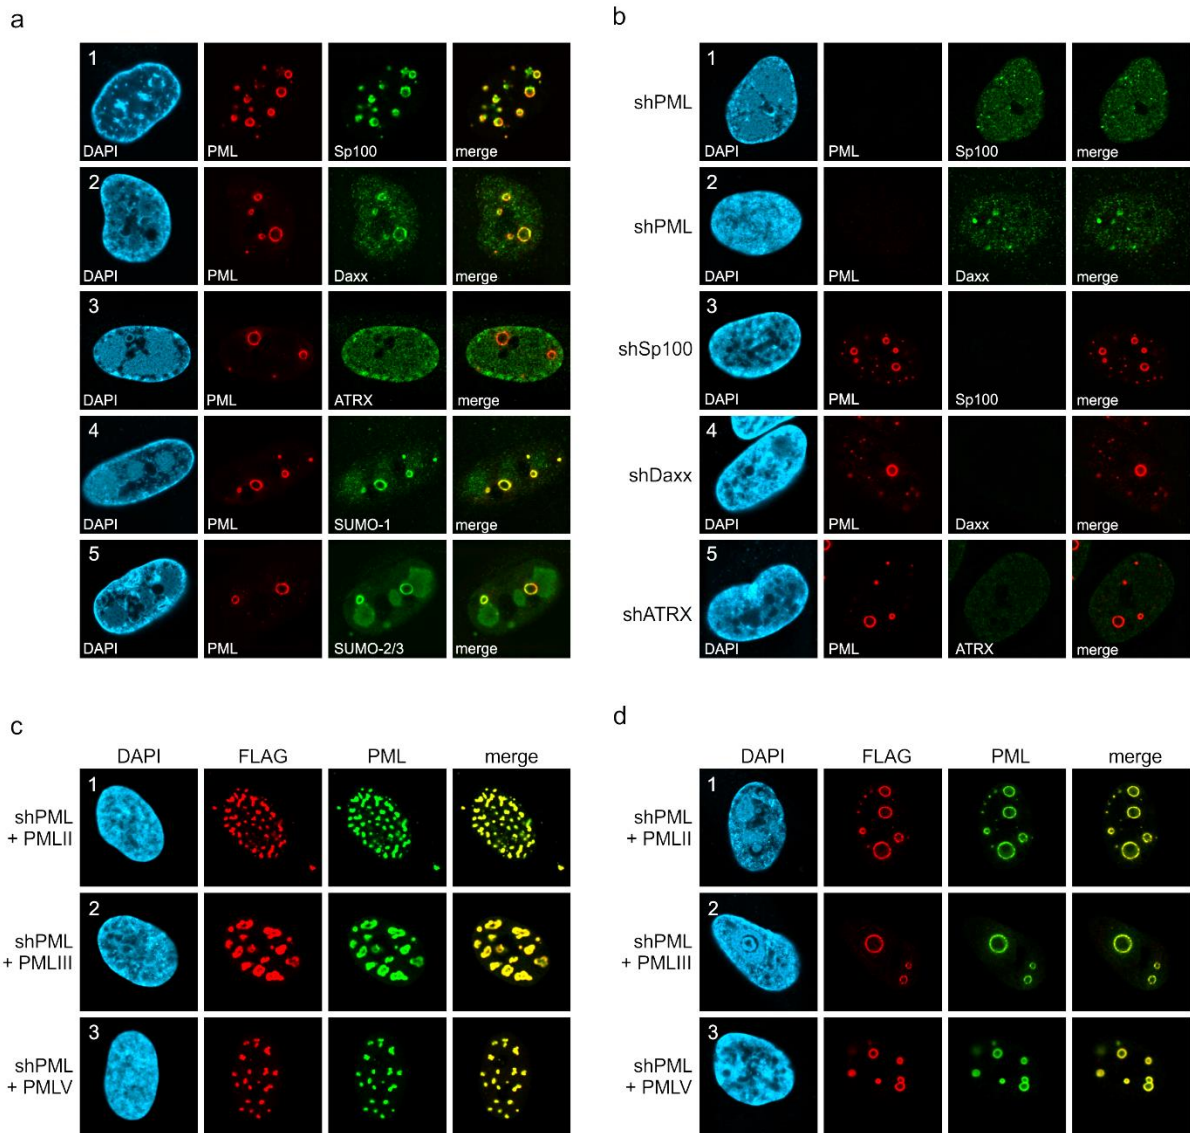

**Figure 2. Protein composition of PML cages.** (a) Recruitment of nuclear body proteins to PML cages. HFF were infected with HCMV/IE1-L174P, based on strain AD169, at a MOI of 5 IEU/cell and harvested at 72 hpi for immunofluorescence staining of PML together with NB components Sp100, Daxx, ATRX, SUMO-1, and SUMO-2 as indicated. (b) PML as key organizer of PML cages. HFF depleted for PML (shPML), Sp100 (shSp100), Daxx (shDaxx) or ATRX (shATRX) were infected with HCMVΔhIE1, based on strain AD169, at a MOI of 5 IEU/cell and harvested at 72 hpi for staining of PML-NB proteins. (c, d) PML isoform-independent formation of PML cages. Flag-tagged PML isoforms II, III, and V were reintroduced into PML-knockdown HFF by lentiviral transduction. Newly generated cells were non-infected (c) or infected with HCMVΔhIE1 at MOI 10 (IEU/cell) for 72 h (d) and were stained with antibodies directed against FLAG and PML. DAPI staining was performed to visualize cell nuclei.

150 was further supported by the finding that PML is required for induction of PML cages, since  
 151 other PML-NB proteins, like Sp100 or Daxx, did not localize to ring-like structures in PML-  
 152 depleted HFF (Fig. 2b, panel 1 and 2). Knockdown of Sp100, Daxx or ATRX, in contrast, did



153 not abolish formation of PML cages (Fig. 2b, panel to 3 to 5). To investigate whether PML  
154 cages are built by a specific isoform, PML-depleted fibroblasts were subjected to lentiviral  
155 transduction in order to reintroduce individual FLAG-tagged PML isoforms. While  
156 overexpression of PML isoform II, III or V resulted in unspecific aggregates in non-infected  
157 cells (Fig. 2c), infection with IE1-deficient HCMV induced a re-organization of all PML  
158 isoforms into ring-shaped structures (Fig. 2d). We conclude that PML cages are not formed by  
159 isoform-specific interactions but require the common N-terminal domain, which contains the  
160 TRIM motif and SUMO sites mediating PML oligomerization and binding partner recruitment,  
161 respectively.

162

### 163 **Formation of PML cages is MOI-dependent but does not require viral DNA replication**

164 IE1-deleted HCMV has been shown to grow in a multiplicity of infection (MOI)-dependent  
165 manner, as efficient early/late gene expression and DNA replication can take place only after  
166 infection with high virus doses<sup>21,27</sup>. In order to evaluate whether formation of PML cages is  
167 also induced in a MOI-dependent manner, we performed a series of infection experiments with  
168 increasing amounts of IE1-deficient HCMV (MOI of 0.1 to 10 IEU/cell). Immunofluorescence  
169 analysis at 72 hpi revealed that size and signal intensity of PML structures increase at higher  
170 MOIs (Fig. 3a). As individual cells showed considerable variation in number and size of PML  
171 foci, we performed ImageJ-based quantification of PML foci and divided them into three groups  
172 containing normal sized (perimeter < 3  $\mu\text{m}$ ), enlarged (perimeter 3-10  $\mu\text{m}$ ), or highly enlarged  
173 PML-NBs (perimeter >10  $\mu\text{m}$ ). As shown in Fig. 3b (MOI 0.1), the total number of PML foci  
174 per cell nucleus was increased after low multiplicity infection, resembling effects that were  
175 observed in interferon-treated cells<sup>14,15</sup>. Under higher MOI conditions, however, the overall  
176 number of PML foci decreased again (Fig. 3b), while a higher percentage of unusually enlarged  
177 PML-NBs was detected (Fig. 3c). Since strongly enlarged PML foci were found particularly  
178 after infection with MOIs greater than 1, which allow lytic replication and viral early/late gene

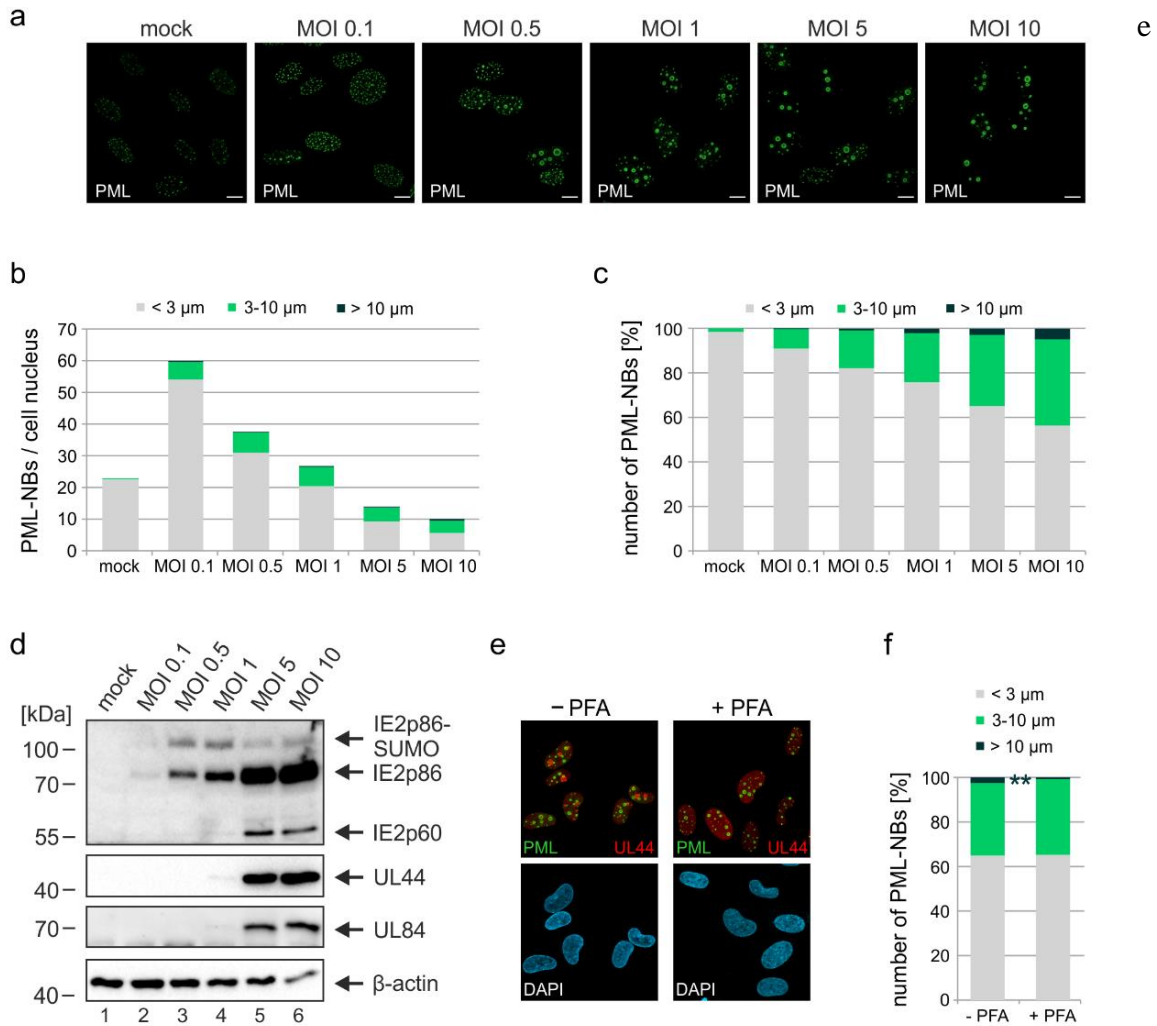

**Figure 3. Impact of virus dose and viral DNA replication on formation of PML cages.** (a-d) MOI-dependent induction of PML cages. HFF were infected with HCMV $\Delta$ hIE1, based on strain AD169, at MOIs ranging from 0.1 to 10 IEU/cell or not infected (mock) and were harvested after 72 h. Immunofluorescence analysis was performed to analyze number and size of PML foci; scale bar, 10  $\mu\text{m}$  (a). ImageJ-based quantification of the PML-NB number and size, determined as perimeter, was performed using maximum intensity projections of confocal z-series images of  $\geq 50$  cells per sample. At MOIs < 1, only infected cells were included in the analysis, which were identified by co-staining of immediate-early protein 2 (IE2) (not shown). PML foci were separated into three groups of normal sized PML-NBs (perimeter < 3  $\mu\text{m}$ ), enlarged PML-NBs (perimeter 3-10  $\mu\text{m}$ ), and highly enlarged PML cages (perimeter >10  $\mu\text{m}$ ). Shown are the absolute numbers of PML-NBs per cell nucleus (b) and the percentage total PML-NBs (c). (d) Western blot detection of viral immediate-early (IE2p86), early (UL44, UL84), and late (IE2p60) proteins. Staining of  $\beta$ -actin was included as internal control. (e, f) Formation of PML cages in absence of viral DNA replication. HFF were infected with HCMV $\Delta$ hIE1 at a MOI of 5 IEU/cell and were treated with 250  $\mu\text{M}$  PFA in parallel with virus inoculation or were left untreated. At 72 hpi, cells were fixed for immunofluorescence staining of PML, UL44 as marker for viral replication centers, and of cell nuclei with DAPI (e), followed by quantification of PML foci size in > 50 cells per sample as described above (f). (f) Mean values derived from biological triplicates are shown. P-values for highly enlarged PML cages were calculated using two-tailed Student's t-tests. \*\*,  $p \leq 0.01$ . PFA, phosphonoformic acid.

179 expression (Fig. 3d), the question arose whether viral DNA replication is required for their  
180 formation. To analyze this, HFF were treated with viral DNA polymerase inhibitor foscarnet  
181 (PFA) or were mock treated at 1.5 h after infection with IE1-deleted HCMV, before being  
182 subjected to immunofluorescence staining of PML and UL44 as a marker for replication centers  
183 (Fig. 3e). Subsequent quantification of PML foci size revealed a slight but significant reduction  
184 of highly enlarged PML structures in the presence of PFA (Fig. 3f). Overall, however, no  
185 abrogation of PML cages was observed (Fig. 3e, f) suggesting that formation of these structures  
186 depends on the amount of input virus but does not require viral DNA replication.

187

### 188 **Interferon and DNA damage signaling act in a cooperative manner to induce PML cages**

189 Previous studies of our and other groups have shown that IE1 blocks IFN signaling during  
190 HCMV infection by affecting both STAT proteins and PML, which has been identified as  
191 positive regulator of IFN-induced gene expression<sup>19,21,28</sup>. Since expression of several PML-NB  
192 proteins, including Sp100 and PML itself, can be upregulated by IFN treatment, we  
193 hypothesized that PML cages may arise due to IFN-mediated increase of PML-NB protein  
194 levels during infection with IE1-deleted virus. To assess the role of IFN signaling for formation  
195 of PML cages, HFF were incubated with IE1-defective HCMV alone, or treated with an anti-  
196 IFN $\alpha/\beta$  receptor antibody (mAb-IFNAR) prior to virus inoculation. Western blot analysis at 72  
197 hpi revealed considerably higher abundances of all PML and Sp100 variants in comparison to  
198 mock infected cells (Fig. 4a, lane 1 and 2). Block of IFN signaling by mAb-IFNAR-antibody  
199 treatment, which was verified by lack of STAT2 phosphorylation, largely reverted this effect  
200 and facilitated virus infection, as reflected by higher levels of viral early and late proteins (Fig.  
201 4a, lane 3). These data correlated with the observation that mAb-IFNAR-antibody treatment  
202 resulted in a clear reduction of enlarged PML structures in infected cells, as assessed by  
203 immunofluorescence staining and quantification of PML foci size (Fig. 4b, c). Having observed  
204 that IFN signaling plays an important role for the formation of PML cages during infection, we

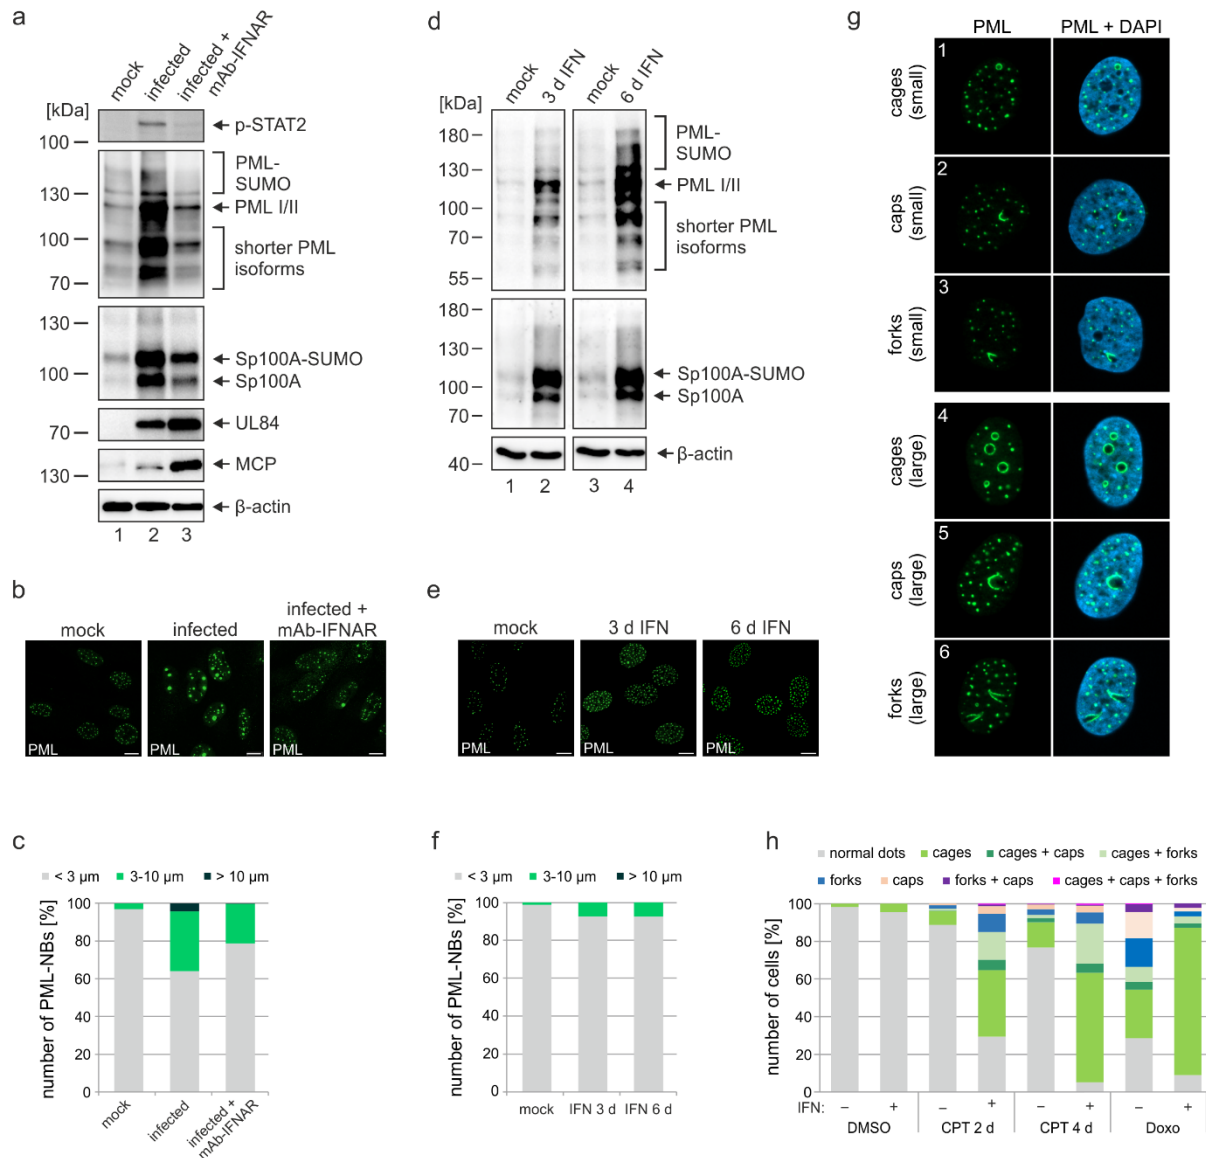

**Figure 4. Role of IFN and DNA damage signaling for induction of PML cages.** (a-d) Reduced formation of PML cages in infected cells upon inhibition of the IFN pathway. HFF were infected with HCMV/IE1-L174P, based on strain AD169, at a MOI of 5 IEU/ml or were not infected (mock). Monoclonal anti-IFN $\alpha/\beta$  receptor antibody (mAb-IFNAR) was added 25 min prior to infection at a concentration of 5  $\mu$ g/ml. Cells were harvested at 72 hpi for Western blot detection using antibodies directed against phosphorylated STAT2, PML, Sp100, viral early protein UL84, viral late protein MCP, and  $\beta$ -actin as control (a) or for immunofluorescence analysis of PML foci (b). Maximum intensity projections of confocal z-series images were used to quantify number and size of PML foci in  $\geq 50$  cell nuclei per sample (c). (d-f) No formation of PML cages by IFN treatment alone. HFF were treated with IFN- $\beta$  (1000 U/ml) for 3 d or 6 d or were left untreated (mock). Cells were subjected to Western blot analysis of PML, Sp100, and  $\beta$ -actin as loading control (d) or were harvested for immunofluorescence staining of PML (e); scale bar, 10  $\mu$ m. Maximum intensity projections of confocal z-series images were used to quantify number and size of PML foci in  $\geq 50$  cell nuclei per sample (f). Scale bars, 10  $\mu$ m. (g-h) Formation of PML cages after stimulation of IFN and DNA damage signaling. (g) Overview of PML structures (cages, caps, and forks) forming upon induction of DNA damage in HFF cells. (h) Quantification of PML structures in HFF cells treated with DNA damage-inducing chemicals CPT and Doxo. HFF cells were seeded at low density (30000 cells / well in 12-Well plates) and, the next day, were mock treated (-) or treated

with 1000 U/ml IFN- $\beta$  (+) for 3 d, followed by addition of CPT or Doxo at final concentrations of 1  $\mu$ M and 0.5  $\mu$ M, respectively, or DMSO as control. Cells were harvested 2 d later (DMSO, Doxo, CPT 2 d) or 4 d later (CPT 4 d) and subjected to immunofluorescence staining of PML. Cell nuclei were visualized with DAPI. Formation of PML structures (cages, forks, circles as well as combinations of these structures as indicated) was assessed in > 1000 cells per sample population derived from two independent experiments. IFN, interferon; CPT, camptothecin; Doxo, doxorubicin.

205 next analyzed whether IFN treatment alone can induce such effects in HFF cells. Treatment of  
206 HFF with IFN- $\beta$  for 3 d or even 6 d resulted in a strong upregulation of all PML and Sp100  
207 variants (Fig. 4d), similar as in cells infected with IE1-deficient HCMV (Fig. 4a). In  
208 immunofluorescence analysis, we detected an enhanced signal intensity and number of PML-  
209 NBs after IFN treatment. However, only few ring-like structures and no strongly enlarged PML  
210 cages were observed (Fig. 4e, f), suggesting that IFN-based upregulation of PML-NB proteins  
211 is not sufficient to induce these structures but that a further stimulus is required which is  
212 provided by the virus. Since rearrangements of PML-NBs have recently been linked to cellular  
213 DNA damage, we speculated that DNA damage signaling, induced by incoming HCMV DNA,  
214 is required in addition to IFN signaling<sup>29</sup>. To test this, HFF were treated with IFN or were mock  
215 treated, and DNA damage was induced by addition of topoisomerase I inhibitor camptothecin  
216 (CPT) or topoisomerase II inhibitor doxorubicin (Doxo). As illustrated in Fig. 4g, different  
217 PML structures were observed, including small and large PML cages as well as structures  
218 termed caps and forks. Intriguingly, while CPT treatment alone for 2d or 4d resulted in small  
219 PML structures (Supplementary Figure 1, panel 3 and 5) in few cells, co-treatment with IFN  
220 evoked also large versions of these structures (Supplementary Figure 1, panel 4 and 6) with  
221 PML cages being present in the majority of cells (Fig. 4h). HFF cells treated with Doxo  
222 displayed all types of PML structures without IFN addition (Fig. 4h; Supplementary Figure 1,  
223 panel 7). Co-treatment of HFF with Doxo and IFN, however, resulted in a rearrangement of  
224 PML-NBs to large cages in > 80% of the cells (Fig. 4h; Supplementary Figure 1, panel 8),  
225 similar to the effect observed in HCMV $\Delta$ IE1-infected cells. In summary, this evidence implies

226 that IFN and DNA damage signaling act in a cooperative manner to drive the formation of PML  
227 cages.

228

### 229 **PML cages entrap HCMV genomes upon entry into the nucleus**

230 As viral DNA has been shown to colocalize with PML bodies upon entry into the nucleus, we  
231 next examined whether a direct association with HCMV genomes triggers PML cages<sup>5</sup>. To  
232 visualize HCMV DNA, we made use of alkyne-modified nucleosides that, after incorporation  
233 into viral DNA, can be detected with fluorescent azides by click chemistry in combination with  
234 antibody staining. Comparison of the incorporation efficiency of EdC (ethynyl-deoxycytidine),  
235 EdU (ethynyl-deoxyuridine), and F-ara-Edu (deoxy-fluoro-ethynyluridine) at different  
236 concentrations demonstrated that EdC was slightly more sensitive for detection of HCMV  
237 replication centers than EdU and significantly more efficient than F-ara-Edu (Supplementary  
238 Figure 2). The lowest dose of 0.1  $\mu$ M EdC or EdU, which was sufficient to stain viral replication  
239 centers, was chosen to generate labeled virus stocks as it had a smaller effect on virus yields  
240 compared to higher doses (Supplementary Figure 3a) and did neither affect viral entry into  
241 fibroblasts nor the onset of HCMV gene expression (Supplementary Figure 3b). Subsequent  
242 infection of HFF cells with labeled IE1-deletion viruses, termed HCMV $\Delta$ IE1<sub>EdC</sub> and  
243 HCMV $\Delta$ IE1<sub>EdU</sub>, yielded signals of viral DNA (vDNA) inside cell nuclei (Fig. 5a, panel 1 to 3),  
244 which were not observed in cells infected with unlabeled virus (Fig. 5a, panel 4). Closer  
245 investigation of vDNA localization at 8 hpi revealed that these signals are frequently associated  
246 with slightly enlarged PML foci, which appeared to form a shell around HCMV genomes (Fig.  
247 5a, panel 1 and 2, arrows). These data implied an entrapment of HCMV genomes by PML-NBs  
248 that was confirmed by deconvolution and 3D reconstruction of z-series images (Fig. 5b). Under  
249 low MOI conditions, such a colocalization was detected for about 70% of viral genomes,  
250 irrespective of whether EdC or EdU was utilized for genome labeling (Fig. 5a, overall  
251 colocalization). Intriguingly, entrapment of HCMV genomes was found to be highly efficient

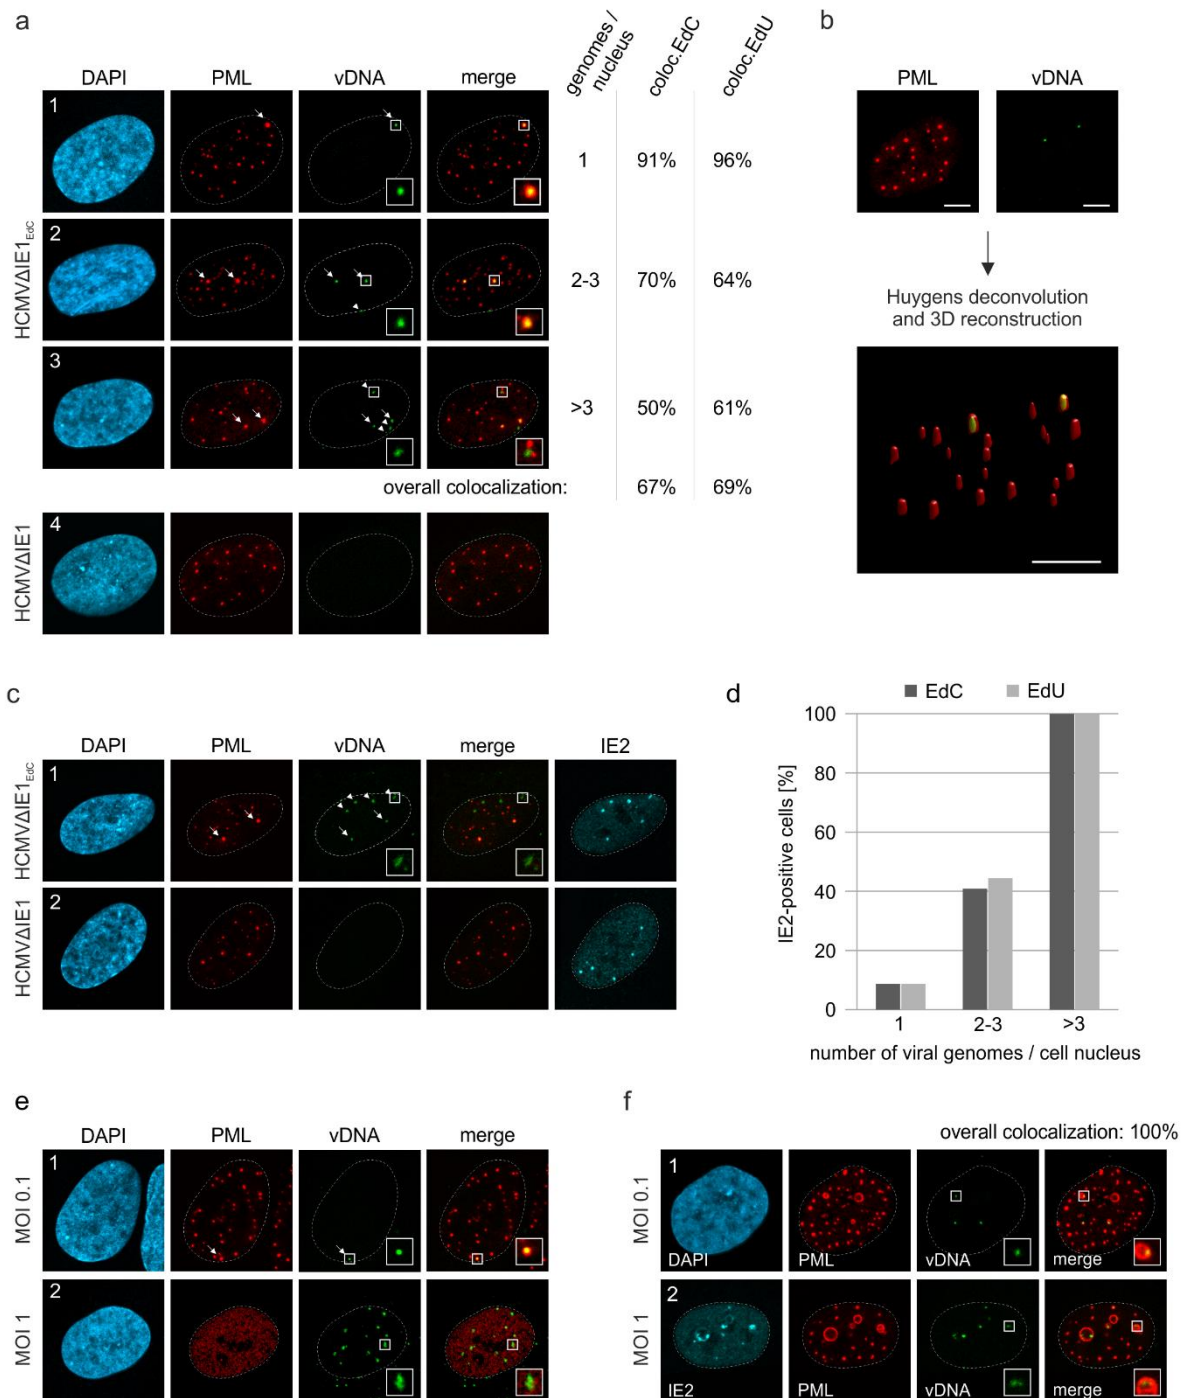

**Figure 5. Entrapment of HCMV input genomes by PML cages.** HFF were infected with EdC-labeled (HCMV $\Delta$ hIE1<sub>EdC</sub>), EdU-labeled (HCMV $\Delta$ hIE1<sub>EdU</sub>) and unlabeled HCMV $\Delta$ hIE1 or respective wild-type viruses (HCMV<sub>EdC</sub>, HCMV), which are all based on strain AD169. At different times after infection, cells were fixed for antibody staining to detect IE2 and/or PML in combination with click chemistry to visualize HCMV input genomes (vDNA). (a) HFF were infected with HCMV $\Delta$ hIE1<sub>EdC</sub>, HCMV $\Delta$ hIE1<sub>EdU</sub> or unlabeled HCMV $\Delta$ hIE1 at a MOI of 0.1 IEU/cell and stained for PML and vDNA at 8 hpi. According to the number of genomes detected in the nucleus, cells were divided in 3 groups. Colocalization of PML and vDNA within these groups as well as overall colocalization is denoted and was determined in  $\geq 50$  cells per sample for EdC (coloc. EdC) and EdU (coloc. EdU) labeling. Genomes encased by PML are marked by arrows, non-colocalizing genomes by arrowheads. (b) 3D reconstruction of a confocal image stack showing PML-NBs in red and HCMV genomes in green. Scale bar, 5 $\mu$ m. (c) HFF were

infected with HCMV $\Delta$ hIE1<sub>EdC</sub> or HCMV $\Delta$ hIE1 at a MOI of 1 IEU/cell for 8h, before they were fixed for immunofluorescence analysis of PML and IE2 combined with click chemistry. (d) HFF were infected, stained, and grouped as described in (A). IE2-positive cells were determined by immunofluorescence staining in  $\geq 50$  cells per sample and are shown as percentages of each group. (e) Infection of HFF was performed with HCMV<sub>EdC</sub> at a MOI of 0.1 or 1 IEU/cell as indicated. PML and vDNA were stained at 8 hpi. (f) HFF were infected with HCMV $\Delta$ hIE1<sub>EdC</sub> at a MOI of 0.1 or 1 IEU/cell as indicated and 72 hpi, cells were fixed for co-staining of PML, IE2, and vDNA. PML-vDNA colocalization after infection with MOI 0.1 was determined in  $\geq 50$  cells. Cell nuclei were stained with DAPI.

252 when only one genome was present in the cell nucleus but was significantly reduced with  
253 increasing number of genomes (Fig. 5a). This was in line with a limited entrapment of viral  
254 genomes under higher MOI conditions (Fig. 5c), which indicates saturation of PML-NB-based  
255 intrinsic defense and provides an explanation for the MOI-dependent restriction of HCMV IE  
256 gene expression<sup>30</sup>. In accordance, nuclear entry of only one genome did not allow IE2  
257 expression in the majority of cells, while the presence of  $> 3$  genomes always resulted in  
258 initiation of HCMV gene expression (Fig. 5d). Notably, at higher MOIs, genomes frequently  
259 switched from a very condensed state to more irregular and expanded shapes that colocalized  
260 with the viral transactivator protein IE2 and are indicative for decompaction and transcriptional  
261 activation of HCMV genomes (compare Fig. 5a, panel 1 with Fig. 5c, panel 1). Analogous  
262 results were obtained for wild-type HCMV<sub>EdC</sub>, since low MOI infection resulted in genome  
263 entrapment as long as IE1 was not expressed (Fig. 5e, panel 1). Under high MOI conditions,  
264 viral genomes were released by IE1-based disruption of PML-NBs and had a more decondensed  
265 appearance (Fig. 5e, panel 2). Finally, we examined whether the PML-NBs that have encased  
266 input viral genomes develop into PML cages at late times after infection. Interestingly, input  
267 genomes were still detectable at 72 h after low MOI infection and were exclusively found inside  
268 large PML structures, independent of the number of genomes per nucleus (Fig. 5f, panel 1). At  
269 higher MOI (MOI of 1), viral genomes again displayed a more diffuse staining pattern allowing  
270 low level IE2 expression but not formation of viral replication compartments (Fig. 1f, panel 2).  
271 However, by far not all PML cages contained HCMV genomes suggesting that their  
272 enlargement is not a direct consequence of the entrapment process. Taken together, our data



273 provide evidence that genome entrapment by PML-NBs has evolved as a mechanism to achieve  
274 efficient and persistent repression of HCMV. Reorganization from dot-like foci to PML cages,  
275 however, cannot be directly linked to vDNA entrapment but seems to result from a more general  
276 stimulus.

277

278 **IE1 expression disrupts PML cages to abrogate the repression of HCMV genomes and**  
279 **also induces dispersal of ALT-associated PML-NBs**

280 Inhibition of HCMV gene expression by PML-NBs has been shown to involve the recruitment  
281 of chromatin-associated factors with repressive activity<sup>11</sup>. In line with this, we detected the  
282 chromosomal DNA-binding protein HP1 $\alpha$  (heterochromatin protein 1 alpha) at PML cages,  
283 which is involved in establishing a stable heterochromatic structure and is usually excluded  
284 from replication centers during wild-type HCMV infection (Fig. 6a). Since Sp100 was  
285 described to interact with HP1 proteins, we analyzed the distribution of HP1 $\alpha$  in Sp100-  
286 depleted cells after HCMV $\Delta$ IE1 infection<sup>31</sup>. Indeed, no colocalization with PML cages was  
287 observed in absence of Sp100 (Fig. 6b, panel 2), whereas knockdown of Daxx did not abolish  
288 HP1 $\alpha$  recruitment (Fig. 6b, panel 3). To get further evidence for an antiviral function of PML  
289 cages, we tested whether disruption of PML cages can abrogate the repression of entrapped  
290 genomes and promote lytic infection. Lentiviral expression of IE1 was used to disrupt PML  
291 cages in cells that had been infected with HCMV $\Delta$ IE1 for 72 h, resulting in a nuclear diffuse  
292 distribution of PML (Fig. 6c, panel 1 and 2). Intriguingly, disruption of PML cages by IE1 led  
293 to an increase of intracellular viral DNA, thus demonstrating a positive effect on HCMV DNA  
294 replication (Fig. 6d). Since the efficiency of lentiviral transduction, as assessed by  
295 quantification of IE1-expressing cells, correlated with the expression of the HCMV early gene  
296 UL44, we conclude that IE1 induces a full relieve of PML-based transcriptional repression (Fig.  
297 6e). To exclude that this effect was based on STAT2 binding and inhibition of IFN signaling  
298 by IE1, HCMV $\Delta$ IE1-infected cells were transduced with lentiviruses expressing the IE1 core

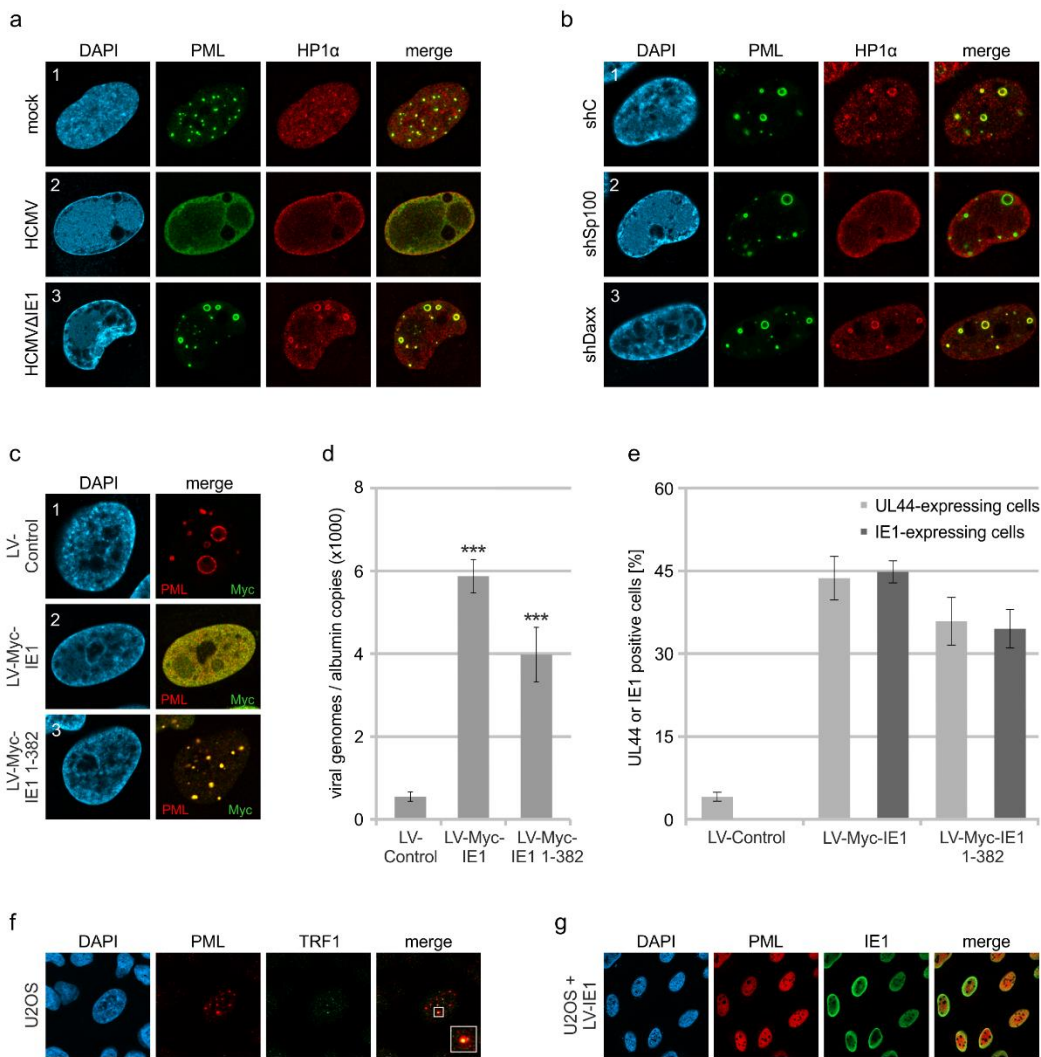

299

**Figure 6. Abrogation of HCMV genome repression by disruption of PML cages.** (a) Recruitment of heterochromatin protein HP1 $\alpha$  to PML cages. HFF were non-infected or infected at a MOI of 5 IEU/cell with HCMV or HCMV $\Delta$ hIE1, based on strain AD169. After 72h, cells were fixed and stained with antibodies directed against PML and HP1 $\alpha$ . (b) Recruitment of HP1 $\alpha$  by Sp100. Control HFF (shC), Sp100-knockdown cells (shSp100), and Daxx-knockdown cells (shDaxx) were infected with HCMV $\Delta$ hIE1 (MOI of 5), followed by immunofluorescence analysis of PML and HP1 $\alpha$  at 72 hpi. (c) Disruption of PML cages by lentiviral expression of IE1. HFF were infected with HCMV $\Delta$ hIE1 at a MOI of 1 IEU/cell for 72h, before they were transduced with lentiviruses encoding Myc-tagged IE1 (LV-Myc-IE1), Myc-tagged IE1 1-382 (LV-Myc-IE1 1-382) or control lentiviruses (LV-control). 4 days after transduction, cells were analyzed by immunofluorescence staining of PML and Myc-IE1. Nuclei were counterstained with DAPI. (d, e) Increase of viral DNA replication upon disruption of PML cages. HFF were treated as described in (c), followed by isolation of total DNA and quantification of viral genome copy numbers by real-time PCR (d) or by immunofluorescence staining of Myc-IE1 or UL44 followed by quantification of protein expression in > 500 cells per sample (e). Values are derived from biological quadruplicates (d) or triplicates (e) and represent mean values  $\pm$  SD. P-values were calculated using two-tailed Student's t-tests. \*\*\*,  $p \leq 0.001$ . (f, g) Disruption of ALT-associated PML-NBs (APBs) by IE1. (f) U2OS cells were stained for endogenous PML and telomere-binding protein TRF1. (g) U2OS cells were transduced with lentiviruses expressing IE1 followed by immunofluorescence analysis of endogenous PML and IE1.

300 region (IE1 1-382), which contains the PML-binding domain but lacks the STAT-binding  
301 region. Consistent with published data, IE1 1-382 did not induce a complete disruption of PML  
302 structures, but colocalized with PML at residual foci that have no antiviral activity (Fig. 6c,  
303 panel 3)<sup>32</sup>. This redistribution of PML cages by IE1 1-382 also resulted in enhanced UL44  
304 expression (Fig. 6e) and HCMV DNA replication (Fig. 6d) thereby corroborating the  
305 hypothesis that PML cages act as antiviral structures.

306 To explore the effect of IE1 on other enlarged PML structures described in literature, we made  
307 use of U2OS cells, in which the alternative lengthening of telomere (ALT) pathway is used for  
308 maintenance of telomers. In accordance with published data, we detected ALT-associated PML  
309 bodies (ABPs) in a minor percentage of cells, which have been suggested to participate in  
310 telomeric maintenance and appeared as enlarged PML-NBs colocalizing with telomere-binding  
311 protein TFR1 (Fig. 6f)<sup>33</sup>. Upon expression of IE1 by lentiviral transduction, PML-NBs were  
312 completely dispersed in U2OS cells indicating that IE1 does not only disrupt antiviral PML  
313 cages but also other enlarged PML structures with cytoprotective function (Fig. 6g).

314

### 315 **PML cages enclose newly assembled viral capsids at late stages of infection**

316 Having observed that PML cages arise in close proximity to viral replication centers (Fig. 1), it  
317 was tempting to speculate that these structures exert an additional antiviral activity during the  
318 late phase of infection. This was supported by the finding that major capsid protein MCP  
319 displayed a clearly altered localization in cells infected with HCMV $\Delta$ IE1 in comparison to  
320 wild-type HCMV-infected cells (Fig. 7a). Since MCP was enriched in PML cages during  
321 HCMV $\Delta$ IE1 infection (Fig. 7a, panel 2), we applied correlative light and electron microscopy  
322 (CLEM) to investigate whether viral capsid proteins or whole nucleocapsids are sequestered by  
323 PML. For this purpose, HFF cells expressing mCherry-tagged PML were established by  
324 lentiviral transduction (Supplementary Fig. 4) and infected with recombinant HCMV encoding  
325 eYFP-tagged IE2, which enabled us to allocate PML-positive and infected cells<sup>34</sup>. After light

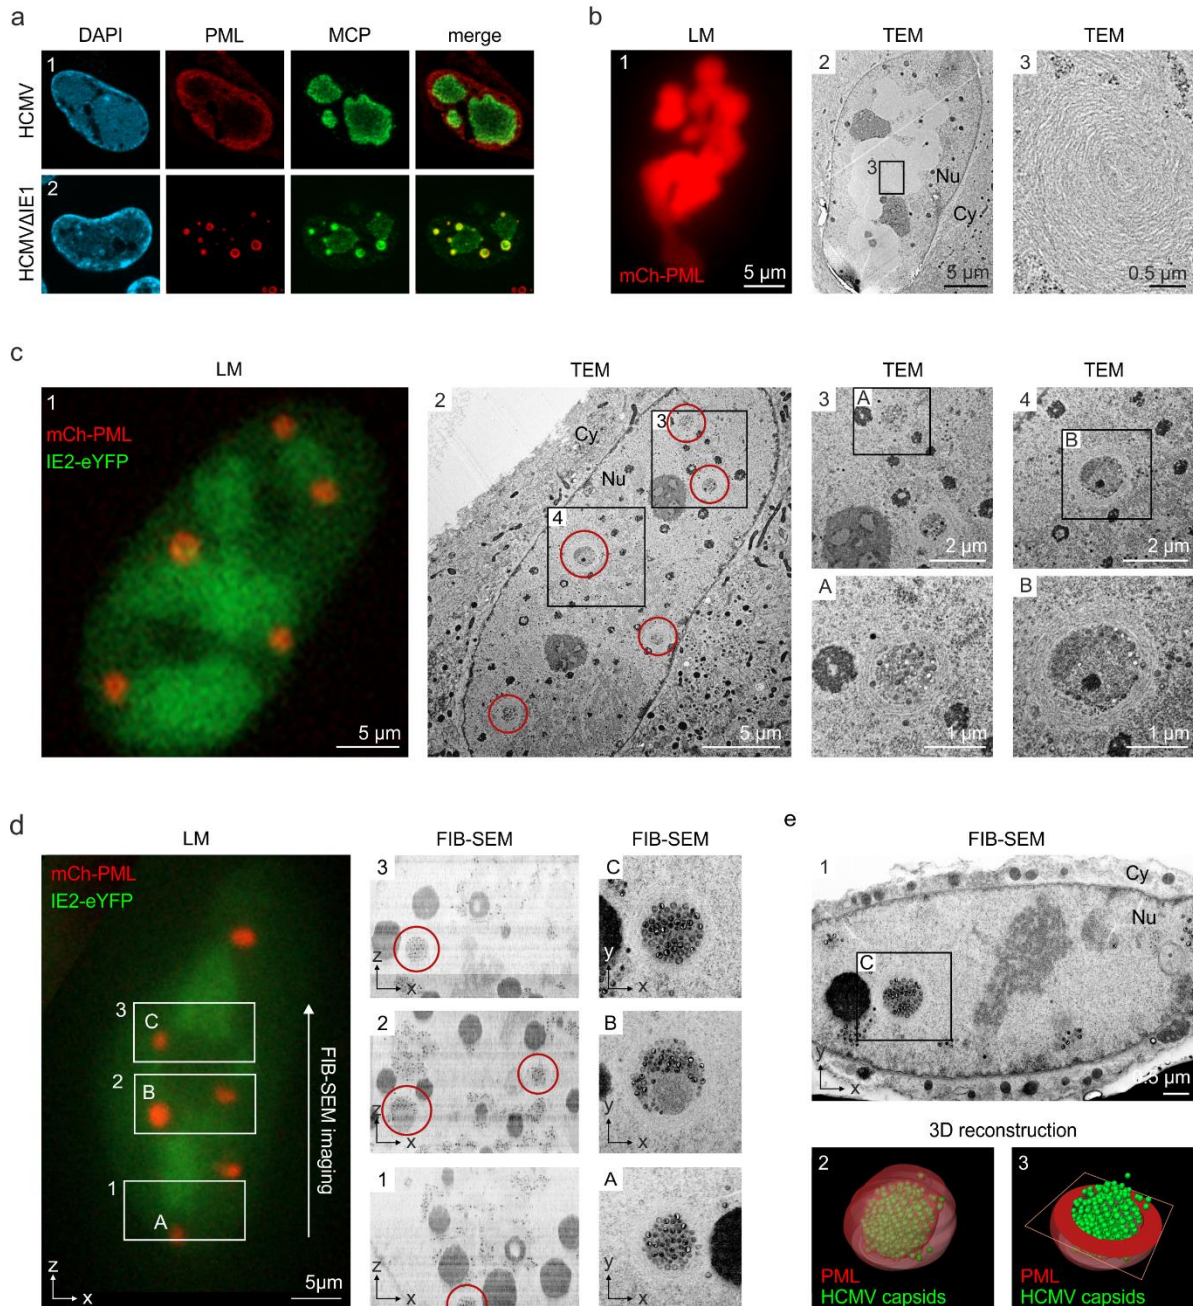

**Figure 7. Entrapment of HCMV nuclear capsids by PML cages.** (a) Localization of major capsid protein MCP to PML cages. HFF were infected with HCMV (MOI of 0.5) or HCMVΔIE1 (MOI of 5), based on strain AD169, and harvested at 3 or 6 days after infection, respectively. Endogenous PML and the HCMV protein MCP were detected by immunofluorescence staining; cell nuclei were counterstained with DAPI. (b-e) Visualization of HCMV capsid entrapment in PML cages by correlative light and electron microscopy (CLEM). HFF expressing mCherry-PML were seeded on carbon-patterned sapphire discs and, one day later, were infected with a TB40E-based recombinant HCMV lacking IE1 and encoding eYFP-tagged IE2 (MOI > 30). 6 days after infection, cells were imaged by fluorescence microscopy (LM) and subjected to EM sample preparation. Selected non-infected (b) or infected (c, d) cells were subsequently analyzed by TEM (b, c) or FIB-SEM tomography (d, see also Video 2). Red circles indicate PML cages that were identified in TEM images (c, panel 2) or in overview pictures generated from aligned FIB-SEM images (d, panels 1-3). (e) 3D reconstruction of a HCMV capsid-containing PML cage. Panel 1: FIB-SEM image from the 2<sup>nd</sup> imaging series containing the PML cage shown in d, panel C. Panel 2: 3D model showing

HCMV capsids in green and surrounding PML in red transparent (see also Video 3). Panel 3: 3D model showing HCMV capsids in green and a cross-section of the PML envelope in red. TEM, transmission electron microscopy; FIB-SEM, focused ion beam-scanning electron microscopy; Nu, nucleus; Cy, cytoplasm.

326 microscopy imaging (LM), cells were analyzed by transmission electron microscopy (TEM)  
327 followed by correlation of LM and TEM images. Analysis of cells with high mCherry-PML  
328 expression revealed that PML assembles to multi-layered, fibrous structures (Fig. 7b). After  
329 infection with HCMV-IE2eYFP, PML aggregates were completely dispersed and, in  
330 accordance, no fiber-like structures were detected in EM images (Supplementary Fig. 5). While  
331 these cells showed an even distribution of viral capsids throughout the cell nuclei  
332 (Supplementary Fig. 5), we observed unusual accumulations of capsids after infection with IE1-  
333 deficient HCMV (HCMV $\Delta$ IE1-IE2eYFP) (Fig. 7b). The capsid clusters were surrounded by  
334 several layers of PML fibers and correlated with mCherry-PML signals in LM images, clearly  
335 demonstrating an entrapment of HCMV capsids by PML cages. Similar capsid accumulations  
336 were detected in non-transduced HFF after infection with IE1-deficient viruses based on strain  
337 TB40E or AD169, suggesting a virus strain-independent entrapment by endogenous PML  
338 (Supplementary Fig. 6). To characterize the capsid packing in more detail, we performed 3D  
339 imaging of mCherry-PML- and IE2-eYFP-positive cells by focused ion beam-scanning electron  
340 microscopy (FIB-SEM) with TEM-like resolution. As shown in Fig. 7d, we analyzed three  
341 consecutive areas within a cell nucleus by FIB-SEM tomography, containing four PML cages  
342 in total (Video 2). Similar to the TEM analysis, PML cages appeared as spherical, fibrous  
343 structures encasing tightly packed nuclear capsids (Fig. 7d, panel A and C) and, in some cases,  
344 additional electron-dense material likely composed of viral DNA or protein aggregates (Fig.  
345 7d, panel B). 3D reconstruction of a PML cage containing exclusively capsids identified 366  
346 capsids in an inner cage volume of  $0.31 \mu\text{m}^3$ , so that a high packing density of about 1180  
347 nuclear capsids/ $\mu\text{m}^3$  can be estimated (Fig. 7e; Video 3). In summary, our data demonstrate that  
348 the restriction mechanism of PML bodies involves an entrapment of incoming HCMV genomes

349 as well as newly assembled HCMV capsids that, during wild-type virus infection, is  
350 antagonized by the regulatory IE1 protein.

## 351 **DISCUSSION**

352 Since their discovery, PML-NBs have been topic of intense investigation, both to elucidate the  
353 structure and to understand the function of these enigmatic nuclear organelles. The general  
354 interest in PML-NBs originated from the tight link between PML-NB integrity and several  
355 pathological conditions such as acute promyelocytic leukemia (APL), neurodegenerative  
356 diseases as well as viral infections, and resulted in a large number of publications implicating  
357 PML-NBs in diverse cellular processes<sup>1,35,36</sup>. These different biochemical activities likely arise  
358 from the high number of PML-associated proteins as well as the dynamic nature of PML-NBs,  
359 which differ in composition, number, size, and position depending on the cellular state<sup>37,38</sup>.  
360 Here, we describe unusually large PML-NBs (Fig. 1), referred to as PML cages, which have  
361 the capacity to entrap both parental viral genomes and newly assembled viral capsids thus  
362 contributing to the restriction of human cytomegalovirus infection. Concerning biogenesis and  
363 composition, PML cages are similar to normal PML-NBs, as the PML protein functions as a  
364 key regulator (Fig. 2b) that recruits all other main components with the only exception of ATRX  
365 (Fig. 2a). Under physiological conditions, ATRX is recruited to PML-NBs via an interaction  
366 with the Daxx protein in order to form a chromatin remodeling complex<sup>39</sup>. Upon HCMV  
367 infection, Daxx is initially targeted for degradation by the viral tegument protein pp71,  
368 however, it re-accumulates at later stages of infection and can be detected at PML cages (Fig.  
369 2a)<sup>23</sup>. Since several interaction partners of Daxx, including ATRX, have been shown to bind  
370 in a mutually exclusive manner, the absence of ATRX from PML cages may indicate an altered  
371 regulation of Daxx during HCMV infection that leads to a switch of interaction partners<sup>40</sup>.  
372 In addition to the main PML-NB components, we found heterochromatin protein HP1 $\alpha$   
373 localizing to PML cages and being recruited by Sp100 (Fig. 6a, b), which is in line with a  
374 previously described interaction between these two proteins<sup>31</sup>. The presence of HP1 $\alpha$  has also  
375 been observed for giant PML bodies in lymphocytes of patients suffering from the ICF  
376 syndrome. This PML structure contains a core of cellular satellite DNA, which is present in a

377 hypomethylated and decondensed state in ICF, and therefore suggests a role of PML-NBs in  
378 the establishment of condensed heterochromatin<sup>26</sup>. However, while HP1 proteins localize to the  
379 center of the PML body and are surrounded by concentric layers of other PML-NB components,  
380 all proteins detected at HCMV-induced PML cages colocalize at the rim thus suggesting subtle  
381 differences in the architecture of giant PML-NBs (Figs. 2a and 6a). Several further reports on  
382 the formation of enlarged PML-NBs can be found in literature, for instance as alternative  
383 lengthening of telomeres (ALT)-associated PML-NBs in telomerase-negative tumor cells, in  
384 cells quiescently infected with HSV-1, and during infection with BK virus or Merkel cell  
385 polyomavirus<sup>8,41-43</sup>. The molecular basis for their formation, however, is far from being  
386 understood. Since during HCMV infection, the immediate-early protein IE1 functions as  
387 inhibitor of interferon (IFN) signaling, we hypothesized that the drastic enlargement of PML-  
388 NBs after infection with IE1-deficient HCMV results from IFN-mediated upregulation of PML-  
389 NB proteins<sup>28</sup>. This would also fit to the observation<sup>28</sup> that PML cages preferentially appear after  
390 infection with high doses of IE1-deficient HCMV (Fig. 3a-c). Indeed, block of the IFN pathway  
391 reduces the formation of PML cages suggesting an important role of IFN in the development  
392 of these structures and corroborating the previous finding that IFN signaling enhances the  
393 antiviral activity of restriction factors (Fig. 4a-c)<sup>44</sup>. However, this effect is not just due to  
394 increased protein amounts, as overexpression of PML (Fig. 2c) or stimulation of PML-NB  
395 protein expression by IFN treatment (Fig. 4d-f) is not sufficient to induce PML cages. Our data  
396 reveal that induction of a DNA damage response is required as an additional stimulus in HFF  
397 cells (Fig. 4g, h). While most studies that implicate PML-NBs in the DNA damage response  
398 have focused on acute cellular DNA damage, very recent data postulate a role in the repair of  
399 persistent DNA damage and even show an association of circular PML structures with such  
400 DNA lesions<sup>29,45</sup>. These PML structures occur after prolonged treatment with DNA damage-  
401 inducing agents<sup>29</sup>, which fits to our observations (Fig. 4h) and also to the slow kinetics of PML  
402 cages biogenesis in HCMV $\Delta$ IE1-infected cells (Fig. 1d). Therefore, it appears likely that PML



403 cages form as a response to continuous interferon and DNA damage signaling during  
404 HCMV $\Delta$ IE1 infection, initiated by incoming viral DNA and enhanced by viral DNA  
405 replication, leading to a further enlargement of PML spheres (Fig. 3f). Of note, IFN signaling  
406 was also found to be upregulated in an animal model of ICF syndrome suggesting that dual  
407 signaling via the interferon and DNA damage response may constitute a common mechanism  
408 whereby entrapment by giant PML nuclear bodies is triggered <sup>46</sup>.

409 As a major finding, our data provide evidence that PML can enclose both input viral genomes  
410 and newly assembled nuclear capsids, which are distinguishable activities occurring at different  
411 times of HCMV infection. To study the association of PML cages with incoming HCMV  
412 genomes, we made use of alkyne-modified deoxynucleosides that allow DNA visualization  
413 without denaturation and have been successfully utilized to detect adenovirus, vaccinia virus,  
414 and herpesvirus DNA <sup>47</sup>. Concerning sensitivity and impact on virus growth, we found that EdC  
415 is most suitable for generation of labeled HCMV (Supplementary Figs. S2 and S3a), although  
416 EdU and F-ara-EdU have been reported to be incorporated with higher efficiency in short-pulse  
417 experiments or being more sensitive for detection of cellular DNA, respectively <sup>48,49</sup>.

418 Visualization of invading HCMV and HCMV $\Delta$ IE1 genomes at immediate-early times of  
419 infection revealed an entrapment of viral DNA (vDNA) in slightly enlarged PML-NBs (Fig. 5a,  
420 b, e), which is highly efficient in cell nuclei containing only one HCMV genome but  
421 significantly reduced with increasing number of viral genomes (Fig. 5a, c). Thus, our data  
422 provide an explanation for the fact that PML-NB-based restriction of HCMV gene expression  
423 can only be observed under low MOI conditions and underline the importance of IE1 for  
424 initiation of lytic replication at low MOI <sup>30</sup>. A similar MOI-dependent envelopment of viral  
425 genomes has recently been described for HSV-1 DNA upon nuclear entry <sup>9</sup>. Compared to our  
426 data on HCMV $\Delta$ IE1, there appears to be a higher degree of PML-vDNA colocalization  
427 indicating a more efficient genome entrapment. However, in contrast to HSV-1, genome  
428 entrapment by PML-NBs may already be antagonized prior to *de novo* viral gene expression by

429 the HCMV tegument protein pp71, which has been shown to disperse ATRX and induce  
430 degradation of Daxx. In fact, this scenario is supported by a reduced frequency of PML  
431 colocalization with HSV-1 genomes in ATRX-depleted cells <sup>9</sup>. Notably, HCMV $\Delta$ IE1 input  
432 genomes remain associated with PML-NBs and can still be detected in a condensed state at the  
433 inner rim of PML cages at 3 days after low multiplicity infection (MOI = 0.1) (Fig. 5f).  
434 Although PML cages cannot completely silence HCMV transcription at higher MOIs (MOI =  
435 1), as suggested by genome decondensation and IE2 expression (Fig. 5f), our data demonstrate  
436 a repressive activity because PML disruption under these conditions results in full  
437 transcriptional recovery and promotes viral genome replication (Fig. 6c-e).

438 As an independent antiviral activity, PML cages are positioned next to viral replication centers  
439 and entrap newly assembled viral capsids. By correlative light and electron microscopy (TEM  
440 and FIB-SEM tomography), we identify PML cages as circular clusters of viral capsids that are  
441 enveloped by PML fibers and occur after high MOI infection with HCMV $\Delta$ IE1 (Fig. 7 c-e;  
442 Supplementary Fig. 6), but not wild-type HCMV (Supplementary Fig. 5). This gives ground to  
443 assume that, after initial disruption of PML-NBs, IE1 remains bound to PML in order to  
444 antagonize capsid entrapment at late stages of HCMV infection and may explain the metabolic  
445 stability of the immediate-early protein <sup>21</sup>. The question remains of how HCMV genomes and  
446 capsids are sensed and entrapped by PML cages. The fact that PML cages form in absence of  
447 viral DNA replication implies a formation or incorporation of viral capsids in pre-assembled  
448 PML structures rather than an active envelopment of nuclear capsids by PML (Fig. 3e, f). A  
449 similar sequestration of viral capsids by PML cages has been found in cells infected with  
450 varicella-zoster virus (VZV) by immuno-electron microscopy <sup>12</sup>. However, a unique C-terminal  
451 domain in PML isoform IV is required for both VZV capsid binding and antiviral activity,  
452 whereas our data show an isoform-independent formation of PML cages (Fig. 2d). This  
453 suggests a requirement of the common N-terminal TRIM region for HCMV restriction and

454 correlates with a previously demonstrated anti-HCMV activity of the shortest, nuclear PML  
455 isoform VI<sup>30</sup>.

456 Taken together, we show a multilayered antiviral role of PML-NBs during HCMV infection,  
457 which is based on an entrapment mechanism likely leading to a more efficient inhibition or  
458 immobilization of viral components. Since the restriction activity of PML at immediate-early  
459 times is overcome by high virus doses, entrapment of nuclear capsids may have evolved as an  
460 additional line of defense in late infected cells, however, both antiviral strategies are efficiently  
461 antagonized by IE1 during wild-type HCMV infection. With regard to previous reports of  
462 sequestration events during HSV-1 and VZV infection, we conclude that entrapment of viral  
463 components by PML-NBs serves as general mechanism to inhibit herpesviral infections.

464 **METHODS**

465 **Oligonucleotides and plasmids:** The oligonucleotide primers used for this study were  
466 purchased from Biomers GmbH (Ulm, Germany) and are listed in Table 1. Lentiviral pLVX-  
467 shRNA1-based vectors containing control shRNA or shRNAs directed against PML, Sp100,  
468 Daxx, and ATRX were generated as described previously (see table 1 for target sequences)<sup>34</sup>.  
469 For stable overexpression of FLAG-tagged PML isoforms, lentiviral pLKO-based vectors were  
470 used, which were kindly provided by Roger Everett (Glasgow, United Kingdom)<sup>50</sup>. The  
471 lentiviral vector used for doxycycline-inducible expression of mCherry-PML, isoform VI, was  
472 generated via PCR amplification of mCherry-PML from pHM2396 using primer 5'attB1-  
473 mCherry and 3\_attB3-PMLVI<sup>30</sup>. The PCR product was inserted into pInducer20-CRSmut via  
474 a combined BP/LR Gateway recombination reaction utilizing pDONR221 as intermediate  
475 vector (Invitrogen, Thermo Fisher Scientific Inc., Waltham, MA, USA). The pInducer20-  
476 CRSmut vector was established by site-directed mutagenesis of the cis-repression sequence  
477 (CRS) within the promoter region of pInducer20 (a gift from S. Elledge) with primers c-CRS-  
478 mut and nc-CRS-mut (see Table 1), since the CRS leads to transcriptional repression during  
479 HCMV infection<sup>51,52</sup>. Lentiviral pLKO-based vectors encoding Myc-tagged IE1 and IE1 1-382  
480 were described elsewhere<sup>32</sup>.

481

482 **Cells and viruses.** Primary human foreskin fibroblast (HFF) cells were isolated from human  
483 foreskin tissue and cultivated at 37 °C and 5% CO<sub>2</sub> in Eagle's minimal essential medium (Gibco,  
484 Thermo Fisher Scientific Inc., Waltham, MA, USA) containing 7 % fetal calf serum (FCS)  
485 (Sigma-Aldrich, Merck KGaA, Darmstadt, Germany), 1% GlutaMAX (Gibco), and penicillin-  
486 streptomycin (Sigma-Aldrich). HFF cells with a stable knockdown of PML, Sp100, hDaxx or  
487 ATRX were maintained in HFF cell culture medium additionally supplemented with 5 µg/ml  
488 puromycin (InvivoGen, San Diego, CA, USA). HFF expressing FLAG-tagged PML isoforms  
489 or mCherry-tagged PML were cultured in the presence of 500 µg/ml geneticin (InvivoGen) and

490 10% FCS, which induced sufficient expression of mCherry-PML (Supplementary Fig. 4).  
491 HEK293T and U2OS cells were cultivated in Dulbecco's minimal essential medium (DMEM)  
492 containing Glutamin (Gibco) and supplemented with 10% FCS (Sigma-Aldrich) and penicillin-  
493 streptomycin (Sigma-Aldrich).

494 Infection experiments of HFF cells were performed with the HCMV strain AD169 as well as  
495 recombinant viruses AD169 $\Delta$ IE1, AD169/IE1-L174P, TB40E-IE2eYFP, and TB40E- $\Delta$ IE1-  
496 IE2eYFP at defined multiplicities of infection (MOI). To determine titers of AD169 and  
497 TB40E-IE2eYFP, HFF were infected with serial dilutions of virus supernatants and, after 24h  
498 of incubation, cells were fixed and stained for IE1. Subsequently, the number of IE1-positive  
499 cells was determined, and viral titers were calculated (IE units/ml). IE1-deleted/mutated viruses  
500 were titrated via determination of genome equivalents in infected cells. For this, HFF cells were  
501 infected with various dilutions of wild-type and recombinant viruses. 16 h later, viral and  
502 cellular DNA was extracted from infected cells using the DNeasy Blood & Tissue Kit (Qiagen,  
503 Hilden, Germany) and subjected to quantitative real-time PCR of HCMV gB and cellular  
504 albumin as described below. Since infection of HFF cells with equivalent genome copy  
505 numbers of wild-type and IE1-deficient HCMV resulted in comparable levels of IE protein  
506 IE2p86, MOIs are indicated in IE units per cell (IEU/cell) for all viruses <sup>21</sup>.

507 For infection experiments, HFF were seeded into six-well dishes at a density of  $3 \times 10^5$   
508 cells/well. One day later, cells were incubated with 1 ml of virus suspension for 1.5 h and were  
509 provided with fresh medium, before they were used for subsequent western blot or  
510 immunofluorescence analyses. For correlative light and electron microscopy (CLEM), HFF  
511 were seeded at a density of  $4 \times 10^4$  cells/well on carbon coated and glow discharged sapphire  
512 discs (Wohlgend GmbH) with coordinate system that were placed into the wells of an 8-well  
513  $\mu$ -slide (ibidi GmbH, Gräfelfing, Germany). After 24 h, cells were incubated with 300  $\mu$ l of  
514 viral supernatant for 1.5 h, before the virus suspension was replaced with fresh medium.

515 Infectivity of TB40 $\Delta$ IE1-IE2eYFP was enhanced by centrifugation at 2000 rpm for 10 min at  
516 room temperature.

517

518 **Generation of recombinant cytomegaloviruses.** Recombinant cytomegaloviruses  
519 AD169 $\Delta$ IE1 and AD169/IE1-L174P are based on bacterial artificial chromosome (BAC) HB15  
520 and were published previously<sup>21</sup>. The recombinant viruses TB40E-IE2eYFP and TB40E $\Delta$ IE1-  
521 IE2eYFP were generated by recombination-based genetic engineering of HCMV BAC TB40E-  
522 Bac4 (kindly provided by Christian Sinzger, Ulm, Germany). For fusion of eYFP to the coding  
523 region of IE2, resulting in TB40E-IE2eYFP, markerless ‘en passant’ mutagenesis was  
524 performed as described<sup>34,53</sup>. Briefly, a linear recombination fragment was generated by  
525 amplification of an I-SceI-aphAI cassette from plasmid pHM3366 (universal transfer construct  
526 based on pEPkan-S) using primers IE2-eYFP-forw and IE2-eYFP-rev (Table 1). For  
527 homologous recombination, the PCR fragment was treated with *DpnI*, gel purified, and  
528 transformed into *Escherichia coli* strain GS1783 harboring TB40E-Bac4 (a gift of M. Mach,  
529 Erlangen), before two-step bacteriophage  $\lambda$  red-mediated recombination was conducted<sup>53</sup>.  
530 Positive transformants were identified by growing the bacteria on agar plates containing  
531 kanamycin (first recombination) or chloramphenicol and 1% arabinose (second recombination)  
532 at 32 °C for one or two days. In order to obtain TB40 $\Delta$ IE1-IE2eYFP that, in addition to the  
533 eYFP-IE2 fusion protein, harbors a deletion of IE1 exon 4, we utilized the Red-mediated  
534 recombination method published by Datsenko and Wanner<sup>54</sup>. For this purpose, a linear  
535 recombination fragment, which comprises a kanamycin resistance cassette as well as 5’ and 3’  
536 genomic sequences, was produced by PCR amplification from pKD13 using primers  
537 5’Intron3/pKD13 and 3’Exon4/pkd13 (Table 1). This fragment was used for transformation of  
538 electrocompetent *Escherichia coli* strain DH10B harboring the TB40E BAC, and homologous  
539 recombination was performed as described previously<sup>54</sup>. After every recombination step, BAC

540 DNA was purified from bacterial colonies and successful recombination was confirmed by  
541 restriction fragment length polymorphism analysis (RFLP), PCR, and sequencing.  
542 HFF and HFF stably expressing IE1<sup>32</sup> were utilized for reconstitution of TB40E-IE2eYFP and  
543 TB40ΔIE1-IE2eYFP, respectively. The cells were seeded in six-well dishes at a density of 3 x  
544 10<sup>5</sup> cells/well, followed by co-transfection with 1 μg purified BAC DNA, 0.5 μg pp71  
545 expression plasmid pCB6-pp71 and 0.5 μg of a vector encoding the Cre recombinase using  
546 FuGENE6 transfection reagent (Promega, Madison, WI, USA). Transfected HFF were  
547 cultivated until viral plaque formation was observed and the supernatants from these cultures  
548 were used for further virus propagation in HFF or IE1-expressing HFF, before the cell culture  
549 supernatant was centrifuged to remove cellular debris and stored at -80°C in aliquots.

550

#### 551 **Stable knockdown and overexpression of proteins in HFF by lentiviral transduction.**

552 Lentiviral transduction was used to establish HFF with a stable knockdown of PML-NB  
553 proteins, for HFF that stably overexpress FLAG-tagged PML isoforms, HFF with inducible  
554 expression of mCherry-PML, and for expression of IE1. Replication-deficient lentiviruses were  
555 produced in HEK293T cells, which were seeded in 10 cm dishes at a density of 5 × 10<sup>6</sup>  
556 cells/dish. After 24h, cells were transfected with the respective lentiviral vector together with  
557 packaging plasmids pLP1, pLP2, and pLP/VSV-G using the Lipofectamine 2000 reagent  
558 (Invitrogen). 16 h later, cells were provided with fresh medium and 48 h after transfection, viral  
559 supernatants were harvested, filtered through a 0.45 μm sterile filter, and stored at -80 °C. To  
560 transduce primary HFF, the cells were incubated for 24 h with lentivirus supernatant in the  
561 presence of 7.5 μg/ml polybrene (Sigma-Aldrich). Stably transduced cell populations were  
562 selected by adding 5 μg/ml puromycin or 500 μg/ml geneticin to the cell culture medium.

563

564 **Quantitative real-time PCR.** To quantify intracellular viral genome copies, total DNA was  
565 extracted from infected cells using the DNeasy Blood & Tissue Kit (Qiagen, Hilden, Germany)

566 and subjected to quantitative qPCR amplification of an HCMV gB (UL55)-specific target  
567 sequence and a sequence region in the cellular albumin gene (ALB) as reference gene (see table  
568 1 for sequences of primers and hydrolysis probes). For determination of reference  $C_T$  values  
569 (cycle threshold), serial dilutions of the respective standards ( $10^8$ - $10^2$  DNA molecules of  
570 HCMV UL55 or cellular ALB) were examined by PCR reactions in parallel. Real-time PCR  
571 was conducted using an Applied Biosystems 7500 Real-Time PCR System (Applied  
572 Biosystems, Foster City, CA, USA) as described previously or an Agilent AriaMx Real-time  
573 PCR System with the corresponding software AriaMx 1.5 (Agilent Technologies, Inc, Santa  
574 Clara, CA, USA)<sup>21</sup>. The 20  $\mu$ L reaction mix contained 5  $\mu$ L sample or standard DNA together  
575 with 10  $\mu$ L 2x SsoAdvanced Universal Probes Supermix (Biorad), 1  $\mu$ L of each primer (5  $\mu$ M  
576 stock solution), 0.3  $\mu$ L of probe (10  $\mu$ M stock solution), and 2.7  $\mu$ L of H<sub>2</sub>O. The thermal cycling  
577 conditions consisted of an initial step of 3 min at 95 °C followed by 40 amplification cycles (10  
578 sec at 95 °C, 30 sec 60 °C). Finally, genome copy numbers were calculated with the sample-  
579 specific  $C_q$  value set in relation to the standard serial dilutions.

580

581 **Western blotting.** For Western blot analysis, total cell lysates were prepared in a sodium  
582 dodecyl sulfate-polyacrylamide gel electrophoresis (SDS-PAGE) loading buffer by boiling for  
583 10 min at 95 °C followed by sonication for 1 min. Proteins were separated on SDS-containing  
584 8 to 12 % polyacrylamide gels and transferred to PVDF membranes (Bio-Rad Laboratories,  
585 Inc., Hercules, USA). After staining with primary and secondary antibodies, proteins were  
586 visualized by chemiluminescence detection using a LAS-1000plus image analyzer (Fuji  
587 Pharma, Tokyo, Japan) or a FUSION FX7 imaging system (Vilber Lourmat, Eberhardzell,  
588 Germany).

589

590 **Immunofluorescence analysis.** Indirect immunofluorescence analysis of HFF cells was  
591 performed by fixation with 4% paraformaldehyde and fluorescence staining as described



592 elsewhere<sup>32</sup>. When late stages of HCMV infection were investigated, an additional blocking  
593 step was performed by incubating cells with 2 mg/ml  $\gamma$ -globulins from human blood (Sigma)  
594 for 30 min at 37°C, before primary antibodies were applied. Confocal images were obtained  
595 with a Leica TCS SP5 confocal microscope or a Zeiss Axio Observer Z1 equipped with an  
596 Apotome.2. The images were processed with Adobe Photoshop CS5 or ZEN 2.3 and assembled  
597 using CorelDraw. For 3D reconstruction of z-series images, Huygens Professional Software  
598 (Scientific Volume Imaging) was used. Stacks of confocal images from single cells were  
599 imaged, deconvoluted using the Huygens Deconvolution wizard and 3D images generated with  
600 the Huygens Surface Renderer tool. For quantifications, z-series images (0.3 - 0.7  $\mu$ m distance)  
601 of at least 50 cell nuclei per sample were taken. To measure number and size (perimeter) of  
602 PML foci, automated ImageJ-based quantification was performed on maximum intensity  
603 projection images. 3D animations were generated from z-series images using the Leica LAS  
604 AF software.

605

#### 606 **Antibodies and chemicals.**

607 Following antibodies were used to detect PML-associated proteins: mAb-PML G8 (Santa Cruz  
608 Biotechnology, Inc., Dallas, TX, USA), pAb-PML #4 (provided by P. Hemmerich, Jena,  
609 Germany), pAb-PML A301-167A in combination with pAb-PML A301-168A (Bethyl  
610 Laboratories, Montgomery, TX, USA), pAb-Sp100 B01 for IF (Abnova, Taipeh, Taiwan), pAb-  
611 Sp100 GH3 for WB (provided by H. Will, Hamburg, Germany), mAb-Daxx MCA2143 (Bio-  
612 Rad), pAb-ATRX H300 (Santa Cruz), Ab-HP1 $\alpha$  2616 (Cell Signaling Technology, Inc  
613 Danvers, MA, USA), pAb-SUMO2/3 ab22654 (Abcam, Cambridge, UK), and mAb-SUMO1  
614 that was provided by Gerrit Praefcke (Langen, Germany). TRF1 was detected with mAb-TRF1  
615 TRF78 obtained from Santa Cruz. Viral proteins were detected with mAb-IE1 p63-27<sup>55</sup>, mAb-  
616 UL44 BS 510 (provided by B. Plachter, Mainz, Germany), and mAb-MCP 28-4 (Waldo et al.,  
617 1989). Polyclonal antisera against viral proteins IE2 (pAb-IE2 pHM178) and UL84 (pAb-

618 UL84) were described previously<sup>56</sup>. FLAG and Myc tagged-proteins were detected with mAb-  
619 FLAG M2 (Sigma-Aldrich) and mAb-Myc 1-9E10.2 (ATCC), respectively.  $\beta$ -actin was  
620 detected with MAb  $\beta$ -actin AC-15 from Sigma-Aldrich. Horseradish peroxidase-conjugated  
621 anti-mouse/-rabbit secondary antibodies for Western blot analysis were obtained from  
622 DIANOVA GmbH (Hamburg, Germany). Alexa Fluor 488-/555-/647-conjugated secondary  
623 antibodies for indirect immunofluorescence experiments were purchased from Invitrogen. PAb  
624 directed against phospho-STAT2 (Tyr689) and MAb directed against human IFN $\alpha$ / $\beta$  receptor  
625 chain 2 (MAB1155) were purchased from Merck-Millipore.

626 Camptothecin (sc-200871) and doxorubicin hydrochloride (Cay15007-5) were obtained from  
627 Santa-Cruz and Biomol (Biomol GmbH, Hamburg, Germany), respectively and dissolved in  
628 DMSO. The ethynyl-labeled nucleosides 5-Ethynyl-2'-deoxyuridine (EdU), 5-Ethynyl-2'-  
629 deoxycytidine (EdC), and (2'S)-2'-Deoxy-2'-fluoro-5-ethynyluridine (F-ara-EdU) were  
630 purchased from Sigma-Aldrich, dissolved in water, and used at indicated concentrations.

631

### 632 **Labeling of viral DNA with ethynyl-modified nucleosides and detection by click chemistry**

633 In order to visualize viral DNA synthesis during infection, HFF cells were treated with  
634 EdU/EdC/F-ara-Edu at 48 h post-infection and fixed 24 h later for staining with fluorescent  
635 azides and antibodies as described below. In order to produce labeled virus stocks, HFF or HFF-  
636 IE1 cells were infected with AD169 or AD169 $\Delta$ IE1 (MOI of 1), respectively, and EdU/EdC  
637 was added at a final concentration of 0.1  $\mu$ M or 1  $\mu$ M at 24 h post-infection. Infected cell  
638 cultures were treated with fresh EdU/EdC every 24 h until a strong cytopathic effect was  
639 observed. Supernatants from infected cells were clarified by centrifugation at 3000 rpm for 10  
640 min and then pelleted by ultra-centrifugation at 23000 rpm for 70 min at 10°C. Pellets were  
641 carefully rinsed with MEM, before they were resuspended using a 20 gauge syringe needle and  
642 filtered through a 0.45  $\mu$ m sterile filter. In order to visualize viral DNA in combination with  
643 antibody staining, HFF infected with EdC/EdU-labeled virus were fixed with 4% PFA for 10

644 min and quenched with 50 mM ammonium chloride and 50 mM glycine in PBS for 5 min at  
645 RT. Afterwards, cells were washed twice with PBS, permeabilized with 0.2 % TritonX100 in  
646 PBS for 15 min at 4°C, and stained with antibodies as described <sup>32</sup>. After washing cells twice  
647 with PBS, copper-catalyzed click reaction was performed by incubating the cells for 90 min at  
648 RT with freshly prepared labeling solution containing 10 µM Alexa Fluor 488 Azide  
649 (Invitrogen), 10 mM sodium ascorbate, 1 mM copper (II) sulfate, 10 mM aminoguanidine, and  
650 1 mM THPTA in PBS. Cells were washed twice with PBS for 2 min and once for 30 min, before  
651 coverslips were mounted on microscope slides using Vectashield Antifade Mounting Medium  
652 with DAPI (Vector laboratories, Maravai LifeSciences, San Diego, CA, USA) and sealed with  
653 nail polish.

654

#### 655 **Correlative light and electron microscopy (CLEM)**

656 For CLEM analysis, sapphire disks with infected cells were prepared as described above (see  
657 Cells and viruses) and imaged by live-cell fluorescence microscopy before being subjected to  
658 EM sample preparation. For fluorescence imaging, the cell culture medium was replaced with  
659 Leibovitz's L-15 medium and whole sapphire disks were imaged at 37°C with a 20x lens  
660 objective of a Zeiss Axio Observer Z1 using the tiling and stitching functions. For EM sample  
661 preparation, infected HFFs grown on sapphire discs were fixed by high-pressure freezing (HPF  
662 Compact 01; Wohlwend GmbH) followed by freeze substitution and stepwise embedding in  
663 epoxy resin (Sigma-Aldrich) as described <sup>57,58</sup>. The embedded cells were first visualized in an  
664 inverted light microscope, compared with fluorescence images and areas for TEM and FIB-  
665 SEM analysis were selected. For TEM analysis, ultrathin sections of 70 nm thickness were  
666 prepared, mounted on formvar coated single slot grids (Plano, Wetzlar, Germany) and  
667 examined with a JEM-1400 (Jeol) TEM at an accelerating voltage of 120 kV. TEM images  
668 were processed with Photoshop Elements 2018 and assembled with CorelDraw 2018. FIB-SEM  
669 analysis was conducted as described previously <sup>59</sup>. In short, a resin disc containing the

670 embedded cells (height of ~1 mm) was mounted onto a SEM specimen stub. The sample was  
671 coated with 5 nm of platinum using an electron beam evaporator (Baltec, Balzers,  
672 Liechtenstein) and FIB-SEM tomography was conducted with a Helios Nanolab 600 (FEI,  
673 Eindhoven, The Netherlands). The coordinate system was used for localization of the selected  
674 cells. Contours of the embedded cells were visualized at an acceleration voltage of 10 kV. In  
675 order to protect the selected cells from beam damage during FIB-milling, the area was covered  
676 with an additional platinum layer using ion beam-induced platinum deposition. A block face  
677 was then generated to gain access to the internal structures of the selected cell. Slice and view  
678 was performed using the software module Auto Slice & View.G1 (FEI). With each step, 20 nm  
679 of material was removed by the FIB and the newly produced block face was imaged with the  
680 SEM at an accelerating voltage of 5 kV using the secondary electron signal recorded with the  
681 through-the-lens detector for TEM-like resolution<sup>58</sup>. The nominal increment of 20 nm between  
682 two images was chosen considerably smaller than the diameter of a capsid so that every capsid  
683 could be detected.

684 The open source software IMOD<sup>60</sup> was used for automatic alignment of FIB-SEM images.  
685 Capsids and PML cages were segmented manually in Avizo 9.4.0 (Thermo Fisher Scientific).  
686 Videos were generated with Avizo 9.4.0 or ImageJ and processed with VSDC Video Editor.

687

## 688 **ACKNOWLEDGEMENTS**

689 This work was supported by the Deutsche Forschungsgemeinschaft (grant STA357/7-1). 3D  
690 reconstruction of confocal images was performed with the support of Dr. Benjamin Schmid of  
691 the Optical Imaging Centre Erlangen (OICE). We would like to thank Andrea Bauer (Ulm) for  
692 help with 3D reconstruction in Avizo.

693

## 694 **COMPETING INTERESTS**

695 The authors declare that there are no competing interests.

## 696 REFERENCES

- 697 1 Tavalai, N. & Stamminger, T. New insights into the role of the subnuclear structure ND10 for  
698 viral infection. *Biochim Biophys Acta* **1783**, 2207-2221, doi:10.1016/j.bbamcr.2008.08.004  
699 S0167-4889(08)00282-6 [pii] (2008).
- 700 2 Everett, R. D. & Chelbi-Alix, M. K. PML and PML nuclear bodies: implications in antiviral  
701 defence. *Biochimie* **89**, 819-830 (2007).
- 702 3 Bernardi, R. & Pandolfi, P. P. Structure, dynamics and functions of promyelocytic leukaemia  
703 nuclear bodies. *Nat.Rev.Mol.Cell Biol.* **8**, 1006-1016 (2007).
- 704 4 Ishov, A. M. & Maul, G. G. The periphery of nuclear domain 10 (ND10) as site of DNA virus  
705 deposition. *J Cell Biol.* **134**, 815-826 (1996).
- 706 5 Ishov, A. M., Stenberg, R. M. & Maul, G. G. Human cytomegalovirus immediate early  
707 interaction with host nuclear structures: definition of an immediate transcript environment. *J*  
708 *Cell Biol.* **138**, 5-16 (1997).
- 709 6 Day, P. M., Baker, C. C., Lowy, D. R. & Schiller, J. T. Establishment of papillomavirus infection is  
710 enhanced by promyelocytic leukemia protein (PML) expression. *Proc Natl Acad Sci U S A* **101**,  
711 14252-14257 (2004).
- 712 7 Catez, F. *et al.* HSV-1 genome subnuclear positioning and associations with host-cell PML-NBs  
713 and centromeres regulate LAT locus transcription during latency in neurons. *PLoS Pathog* **8**,  
714 e1002852, doi:10.1371/journal.ppat.1002852 (2012).
- 715 8 Everett, R. D., Murray, J., Orr, A. & Preston, C. M. Herpes simplex virus type 1 genomes are  
716 associated with ND10 nuclear substructures in quiescently infected human fibroblasts. *J Virol*  
717 **81**, 10991-11004 (2007).
- 718 9 Alandijany, T. *et al.* Distinct temporal roles for the promyelocytic leukaemia (PML) protein in  
719 the sequential regulation of intracellular host immunity to HSV-1 infection. *PLoS Pathog* **14**,  
720 e1006769, doi:10.1371/journal.ppat.1006769 (2018).
- 721 10 Komatsu, T., Nagata, K. & Wodrich, H. An Adenovirus DNA Replication Factor, but Not Incoming  
722 Genome Complexes, Targets PML Nuclear Bodies. *J Virol* **90**, 1657-1667,  
723 doi:10.1128/jvi.02545-15 (2016).
- 724 11 Tavalai, N. & Stamminger, T. Interplay between Herpesvirus Infection and Host Defense by  
725 PML Nuclear Bodies. *Viruses* **1**, 1240-1264, doi:10.3390/v1031240  
726 viruses-01-01240 [pii] (2009).
- 727 12 Reichelt, M. *et al.* Entrapment of viral capsids in nuclear PML cages is an intrinsic antiviral host  
728 defense against varicella-zoster virus. *PLoS pathogens* **7**, e1001266 (2011).
- 729 13 Reichelt, M. *et al.* 3D reconstruction of VZV infected cell nuclei and PML nuclear cages by serial  
730 section array scanning electron microscopy and electron tomography. *PLoS Pathog* **8**,  
731 e1002740, doi:10.1371/journal.ppat.1002740 (2012).
- 732 14 Chelbi-Alix, M. K. *et al.* Induction of the PML protein by interferons in normal and APL cells.  
733 *Leukemia* **9**, 2027-2033 (1995).
- 734 15 Lavau, C. *et al.* The acute promyelocytic leukaemia-associated PML gene is induced by  
735 interferon. *Oncogene* **11**, 871-876 (1995).
- 736 16 Regad, T. *et al.* PML mediates the interferon-induced antiviral state against a complex  
737 retrovirus via its association with the viral transactivator. *EMBO J* **20**, 3495-3505 (2001).
- 738 17 Chee, A. V., Lopez, P., Pandolfi, P. P. & Roizman, B. Promyelocytic leukemia protein mediates  
739 interferon-based anti-herpes simplex virus 1 effects. *J Virol* **77**, 7101-7105 (2003).
- 740 18 Ulbricht, T. *et al.* PML promotes MHC class II gene expression by stabilizing the class II  
741 transactivator. *J.Cell Biol.* **199**, 49-63 (2012).
- 742 19 Kim, Y. E. & Ahn, J. H. Positive role of promyelocytic leukemia protein in type I interferon  
743 response and its regulation by human cytomegalovirus. *PLoS Pathog* **11**, e1004785,  
744 doi:10.1371/journal.ppat.1004785  
745 PPATHOGENS-D-14-02716 [pii] (2015).

- 746 20 El Asmi, F. *et al.* Implication of PMLIV in Both Intrinsic and Innate Immunity. *PLoS.Pathog.* **10**,  
747 e1003975 (2014).
- 748 21 Scherer, M. *et al.* Characterization of Recombinant Human Cytomegaloviruses Encoding IE1  
749 Mutants L174P and 1-382 Reveals that Viral Targeting of PML Bodies Perturbs both Intrinsic  
750 and Innate Immune Responses. *J Virol* **90**, 1190-1205, doi:10.1128/JVI.01973-15  
751 JVI.01973-15 [pii] (2016).
- 752 22 Lukashchuk, V., McFarlane, S., Everett, R. D. & Preston, C. M. Human cytomegalovirus protein  
753 pp71 displaces the chromatin-associated factor ATRX from nuclear domain 10 at early stages  
754 of infection. *J.Virol.* **82**, 12543-12554 (2008).
- 755 23 Saffert, R. T. & Kalejta, R. F. Inactivating a cellular intrinsic immune defense mediated by Daxx  
756 is the mechanism through which the human cytomegalovirus pp71 protein stimulates viral  
757 immediate-early gene expression. *J Virol* **80**, 3863-3871 (2006).
- 758 24 Schilling, E. M. *et al.* The Human Cytomegalovirus IE1 Protein Antagonizes PML Nuclear Body-  
759 Mediated Intrinsic Immunity via the Inhibition of PML De Novo SUMOylation. *J Virol* **91**,  
760 doi:10.1128/jvi.02049-16 (2017).
- 761 25 Boutell, C. *et al.* A viral ubiquitin ligase has substrate preferential SUMO targeted ubiquitin  
762 ligase activity that counteracts intrinsic antiviral defence. *PLoS.Pathog.* **7**, e1002245 (2011).
- 763 26 Luciani, J. J. *et al.* PML nuclear bodies are highly organised DNA-protein structures with a  
764 function in heterochromatin remodelling at the G2 phase. *J Cell Sci* **119**, 2518-2531,  
765 doi:10.1242/jcs.02965 (2006).
- 766 27 Greaves, R. F. & Mocarski, E. S. Defective growth correlates with reduced accumulation of a  
767 viral DNA replication protein after low-multiplicity infection by a human cytomegalovirus ie1  
768 mutant. *J Virol* **72**, 366-379 (1998).
- 769 28 Paulus, C., Krauss, S. & Nevels, M. A human cytomegalovirus antagonist of type I IFN-  
770 dependent signal transducer and activator of transcription signaling. *Proc Natl Acad Sci U S A*  
771 **103**, 3840-3845 (2006).
- 772 29 Imrichova, T. *et al.* Dynamic PML protein nucleolar associations with persistent DNA damage  
773 lesions in response to nucleolar stress and senescence-inducing stimuli. *Aging* **11**, 7206-7235,  
774 doi:10.18632/aging.102248 (2019).
- 775 30 Tavalai, N., Papior, P., Rechter, S., Leis, M. & Stamminger, T. Evidence for a role of the cellular  
776 ND10 protein PML in mediating intrinsic immunity against human cytomegalovirus infections.  
777 *J Virol* **80**, 8006-8018, doi:80/16/8006 [pii]  
778 10.1128/JVI.00743-06 (2006).
- 779 31 Seeler, J. S., Marchio, A., Sitterlin, D., Transy, C. & Dejean, A. Interaction of SP100 with HP1  
780 proteins: a link between the promyelocytic leukemia-associated nuclear bodies and the  
781 chromatin compartment. *Proc.Natl.Acad.Sci.U.S.A* **95**, 7316-7321 (1998).
- 782 32 Scherer, M. *et al.* Crystal structure of cytomegalovirus IE1 protein reveals targeting of TRIM  
783 family member PML via coiled-coil interactions. *PLoS.Pathog.* **10**, e1004512 (2014).
- 784 33 Grobelny, J. V., Godwin, A. K. & Broccoli, D. ALT-associated PML bodies are present in viable  
785 cells and are enriched in cells in the G(2)/M phase of the cell cycle. *Journal of cell science* **113**  
786 **Pt 24**, 4577-4585 (2000).
- 787 34 Wagenknecht, N. *et al.* Contribution of the Major ND10 Proteins PML, hDaxx and Sp100 to the  
788 Regulation of Human Cytomegalovirus Latency and Lytic Replication in the Monocytic Cell Line  
789 THP-1. *Viruses.* **7**, 2884-2907 (2015).
- 790 35 Grimwade, D. & Solomon, E. Characterisation of the PML/RAR alpha rearrangement associated  
791 with t(15;17) acute promyelocytic leukaemia. *Curr Top Microbiol Immunol* **220**, 81-112,  
792 doi:10.1007/978-3-642-60479-9\_6 (1997).
- 793 36 Yasuda, S. *et al.* Triggering of neuronal cell death by accumulation of activated SEK1 on nuclear  
794 polyglutamine aggregations in PML bodies. *Genes to cells : devoted to molecular & cellular*  
795 *mechanisms* **4**, 743-756, doi:10.1046/j.1365-2443.1999.00294.x (1999).

- 796 37 Eskiw, C. H., Dellaire, G., Mymryk, J. S. & Bazett-Jones, D. P. Size, position and dynamic behavior  
797 of PML nuclear bodies following cell stress as a paradigm for supramolecular trafficking and  
798 assembly. *J Cell Sci* **116**, 4455-4466, doi:10.1242/jcs.00758 (2003).
- 799 38 Weidtkamp-Peters, S. *et al.* Dynamics of component exchange at PML nuclear bodies. *J Cell Sci*  
800 **121**, 2731-2743, doi:10.1242/jcs.031922 (2008).
- 801 39 Tang, J. *et al.* A novel transcription regulatory complex containing death domain-associated  
802 protein and the ATR-X syndrome protein. *J Biol Chem* **279**, 20369-20377 (2004).
- 803 40 Li, Z., Zhao, D., Xiang, B. & Li, H. Structural and biochemical characterization of DAXX-ATRAX  
804 interaction. *Protein & cell* **8**, 762-766, doi:10.1007/s13238-017-0463-x (2017).
- 805 41 Jiang, M., Entezami, P., Gamez, M., Stamminger, T. & Imperiale, M. J. Functional reorganization  
806 of promyelocytic leukemia nuclear bodies during BK virus infection. *MBio*. **2**, e00281-00210  
807 (2011).
- 808 42 Yeager, T. R. *et al.* Telomerase-negative immortalized human cells contain a novel type of  
809 promyelocytic leukemia (PML) body. *Cancer Res* **59**, 4175-4179 (1999).
- 810 43 Neumann, F. *et al.* Replication of Merkel cell polyomavirus induces reorganization of  
811 promyelocytic leukemia nuclear bodies. *J Gen Virol* **97**, 2926-2938, doi:10.1099/jgv.0.000593  
812 (2016).
- 813 44 Sakuma, R., Mael, A. A. & Ikeda, Y. Alpha interferon enhances TRIM5alpha-mediated antiviral  
814 activities in human and rhesus monkey cells. *J Virol* **81**, 10201-10206, doi:10.1128/jvi.00419-  
815 07 (2007).
- 816 45 Vancurova, M. *et al.* PML nuclear bodies are recruited to persistent DNA damage lesions in an  
817 RNF168-53BP1 dependent manner and contribute to DNA repair. *DNA repair* **78**, 114-127,  
818 doi:10.1016/j.dnarep.2019.04.001 (2019).
- 819 46 Rajshekar, S. *et al.* Pericentromeric hypomethylation elicits an interferon response in an  
820 animal model of ICF syndrome. *Elife* **7**, doi:10.7554/eLife.39658 (2018).
- 821 47 Wang, I. H. *et al.* Tracking viral genomes in host cells at single-molecule resolution. *Cell Host*  
822 *Microbe* **14**, 468-480, doi:10.1016/j.chom.2013.09.004 (2013).
- 823 48 Manska, S., Octaviano, R. & Rossetto, C. C. 5-Ethynyl-2'-deoxycytidine and 5-ethynyl-2'-  
824 deoxyuridine are differentially incorporated in cells infected with HSV-1, HCMV, and KSHV  
825 viruses. *J Biol Chem* **295**, 5871-5890, doi:10.1074/jbc.RA119.012378 (2020).
- 826 49 Neef, A. B. & Luedtke, N. W. Dynamic metabolic labeling of DNA in vivo with arabinosyl  
827 nucleosides. *Proc Natl Acad Sci U S A* **108**, 20404-20409, doi:10.1073/pnas.1101126108 (2011).
- 828 50 Cuchet, D. *et al.* PML isoforms I and II participate in PML-dependent restriction of HSV-1  
829 replication. *J Cell Sci* **124**, 280-291, doi:10.1242/jcs.075390  
830 10.1242/jcs.075390.
- 831 51 Meerbrey, K. L. *et al.* The pINDUCER lentiviral toolkit for inducible RNA interference in vitro  
832 and in vivo. *Proc Natl Acad Sci U S A* **108**, 3665-3670, doi:10.1073/pnas.1019736108 (2011).
- 833 52 Reuter, N., Reichel, A., Stilp, A. C., Scherer, M. & Stamminger, T. SUMOylation of IE2p86 is  
834 required for efficient autorepression of the human cytomegalovirus major immediate-early  
835 promoter. *J Gen Virol* **99**, 369-378, doi:10.1099/jgv.0.001021 (2018).
- 836 53 Tischer, B. K., von, E. J., Kaufer, B. & Osterrieder, N. Two-step red-mediated recombination for  
837 versatile high-efficiency markerless DNA manipulation in Escherichia coli. *Biotechniques* **40**,  
838 191-197 (2006).
- 839 54 Datsenko, K. A. & Wanner, B. L. One-step inactivation of chromosomal genes in Escherichia  
840 coli K-12 using PCR products. *Proc. Natl. Acad. Sci. U.S.A* **97**, 6640-6645 (2000).
- 841 55 Andreoni, M., Faircloth, M., Vugler, L. & Britt, W. J. A rapid microneutralization assay for the  
842 measurement of neutralizing antibody reactive with human cytomegalovirus. *J Virol. Methods*  
843 **23**, 157-167 (1989).
- 844 56 Hofmann, H., Floss, S. & Stamminger, T. Covalent modification of the transactivator protein  
845 IE2-p86 of human cytomegalovirus by conjugation to the ubiquitin-homologous proteins  
846 SUMO-1 and hSMT3b. *J. Virol.* **74**, 2510-2524 (2000).

- 847 57 Walther, P. & Ziegler, A. Freeze substitution of high-pressure frozen samples: the visibility of  
848 biological membranes is improved when the substitution medium contains water. *J Microsc*  
849 **208**, 3-10, doi:10.1046/j.1365-2818.2002.01064.x (2002).
- 850 58 Villinger, C. *et al.* FIB/SEM tomography with TEM-like resolution for 3D imaging of high-  
851 pressure frozen cells. *Histochem Cell Biol* **138**, 549-556, doi:10.1007/s00418-012-1020-6  
852 10.1007/s00418-012-1020-6.
- 853 59 Villinger, C., Neusser, G., Kranz, C., Walther, P. & Mertens, T. 3D Analysis of HCMV Induced-  
854 Nuclear Membrane Structures by FIB/SEM Tomography: Insight into an Unprecedented  
855 Membrane Morphology. *Viruses* **7**, 5686-5704, doi:10.3390/v7112900 (2015).
- 856 60 Kremer, J. R., Mastronarde, D. N. & McIntosh, J. R. Computer visualization of three-  
857 dimensional image data using IMOD. *Journal of structural biology* **116**, 71-76,  
858 doi:10.1006/jsbi.1996.0013 (1996).

859



## SUPPLEMENTAL INFORMATION

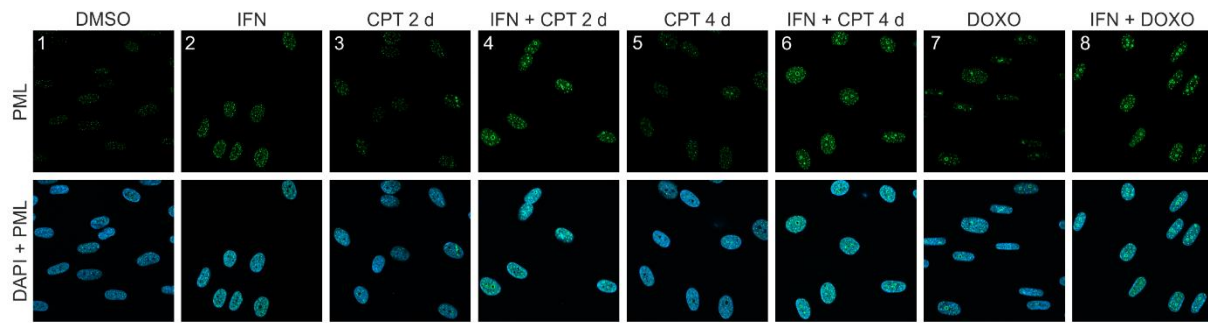

**Supplementary Figure 1. Effect of IFN and DNA damage on PML localization.** HFF cells were seeded at low density (30000 cells / well in 12-well plates) and were treated DMSO, IFN- $\beta$  (1000 U/ml) or co-treated with IFN and CPT (1  $\mu$ M) or Doxo (0.5  $\mu$ M). Cells were harvested 2 d later (panel 1-4, 7, 8) or 4 d later (panel 5, 6) and subjected to immunofluorescence staining of PML. Cell nuclei were visualized with DAPI. IFN, interferon; CPT, camptothecin; Doxo, doxorubicin.

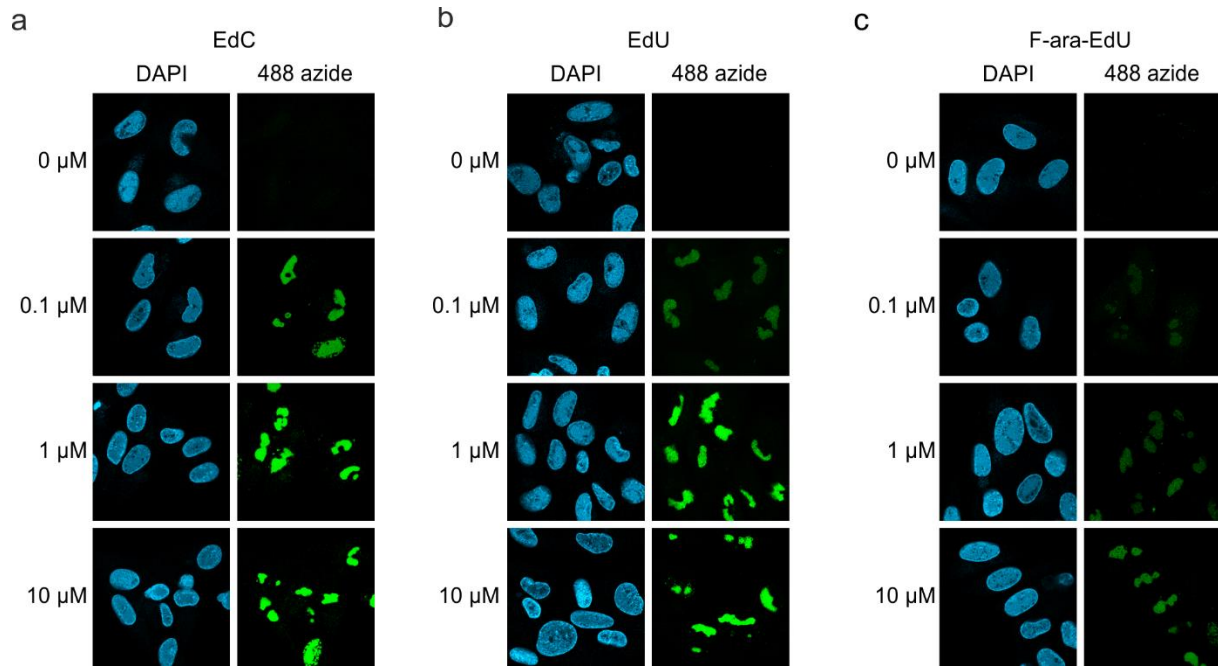

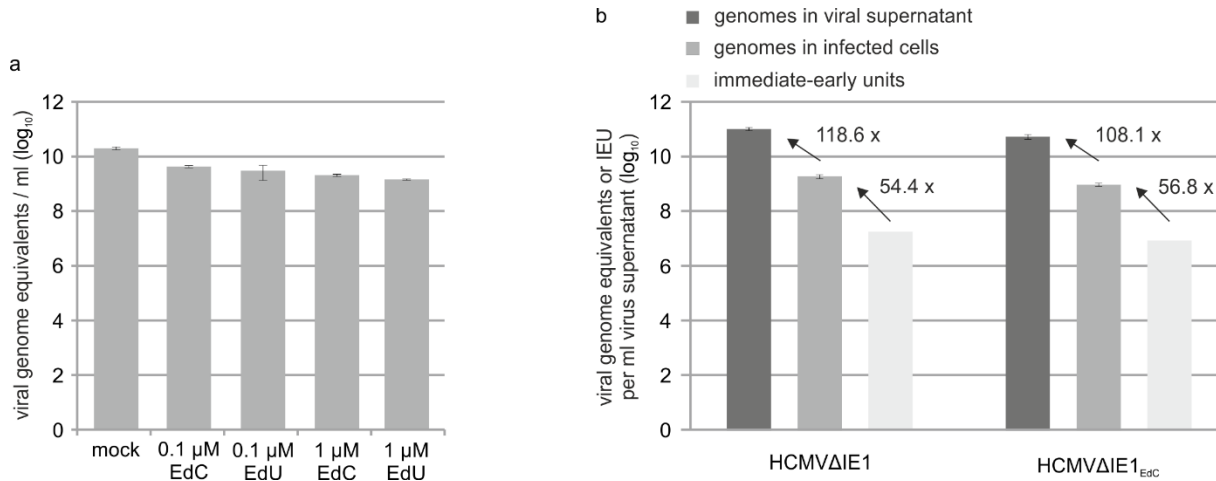

**Supplementary Figure 3. Effect of alkyne-modified nucleosides on HCMV growth and IE gene expression.** (a) IE1-deleted HCMV (strain AD16) was grown on HFF cells that stably express IE1 either in absence of nucleoside-analogs (mock) or in the presence of EdC or EdU (0.1  $\mu$ M or 1  $\mu$ M). Viral supernatants were subjected to protease K treatment followed by HCMV gB-specific real-time PCR to determine HCMV genome numbers. Values are derived from triplicate samples and represent mean values  $\pm$  SD. (b) IE1-deleted HCMV, strain AD169, was grown on HFF-IE1 in the absence (HCMV $\Delta$ IE1) or presence (HCMV $\Delta$ IE1<sub>EdC</sub>) of 0.1  $\mu$ M EdC. After purification of viral supernatants by centrifugation, viral genome copies were quantified by protease K treatment and HCMV gB-specific real-time PCR (genomes in viral supernatant). To determine intracellular viral genome copies, HFFs were infected with HCMV $\Delta$ IE1 or HCMV $\Delta$ IE1<sub>EdC</sub> followed by extraction of total DNA at 16 hpi and HCMV gB-specific real-time PCR (genomes in infected cells). To measure the influence of EdC labeling on IE gene expression, HFF were infected with different dilutions of HCMV $\Delta$ IE1 or HCMV $\Delta$ IE1<sub>EdC</sub>. 24 h after infection, cells were stained for IE2 and the number of IE2-positive cells was determined to calculate viral titers (immediate-early units). All values were extrapolated to 1 ml of input virus.

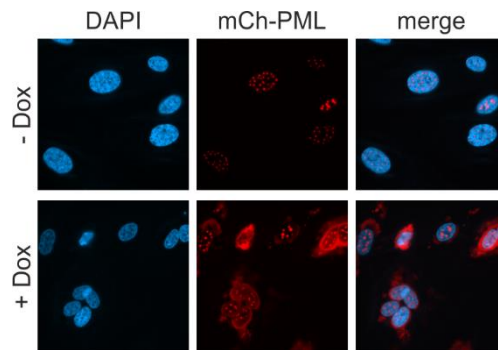

**Supplementary Figure 4. Characterization of HFF with doxycycline-inducible expression of mCherry-PML.** HFF expressing mCherry-tagged PML, isoform VI, were cultured in complete medium containing 10% FCS and were either mock treated (upper panel) or treated with 0.5  $\mu\text{g/ml}$  doxycycline (lower panel). 24 h later, cells were fixed, stained with DAPI and analyzed for mCherry-PML, which was sufficiently expressed without the addition of doxycycline.

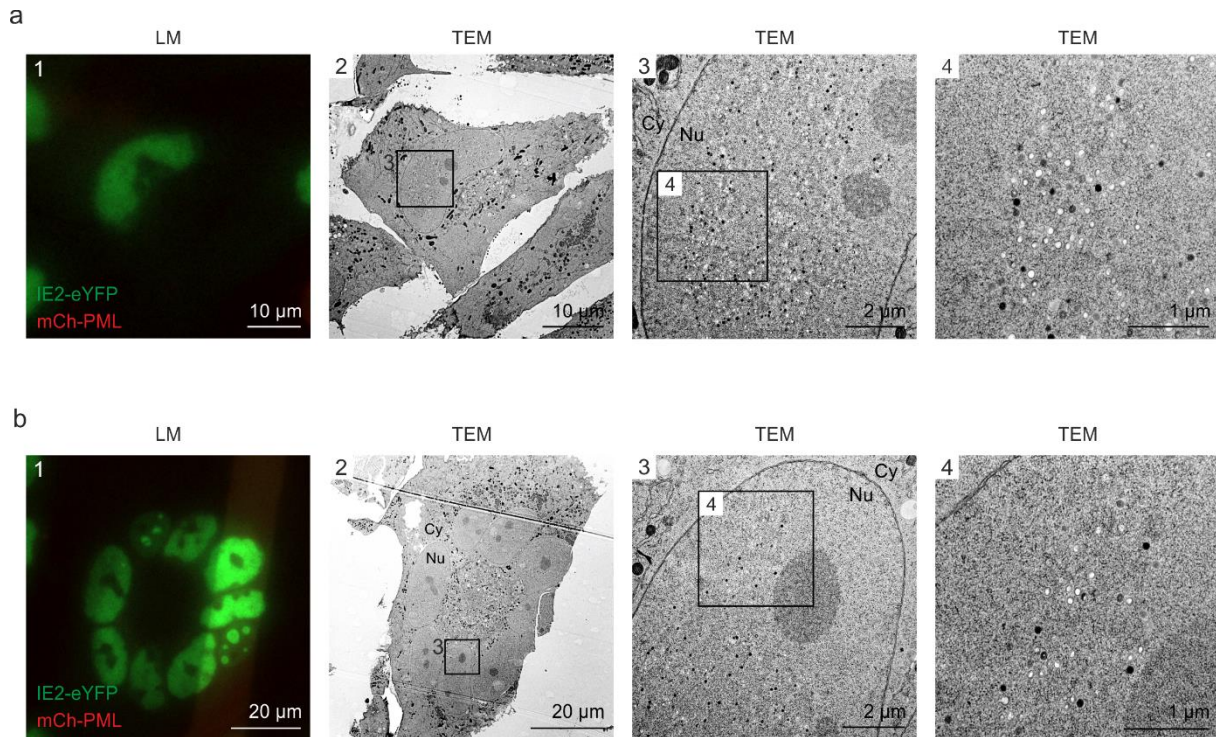

**Supplementary Figure 5. Even distribution of viral capsids in HCMV-IE2eYFP-infected cell nuclei.** For CLEM analysis, HFF expressing mCherry-PML were seeded on carbon-patterned sapphire discs and, one day later, were infected with recombinant HCMV encoding IE2-eYFP, based von strain TB40E (MOI of 3). 4 days after infection, cells were imaged by fluorescence microscopy (LM) and subjected to EM sample preparation. Selected single cells (a) or syncytia (b) were analyzed by TEM. Due to the disruption of PML foci by HCMV-IE2eYFP and the resulting low signal intensity on carbon-coated sapphire disks, mCherry-PML signals are not visible in LM images. LM, light microscopy; TEM, transmission electron microscopy; Nu, nucleus; Cy, cytoplasm.

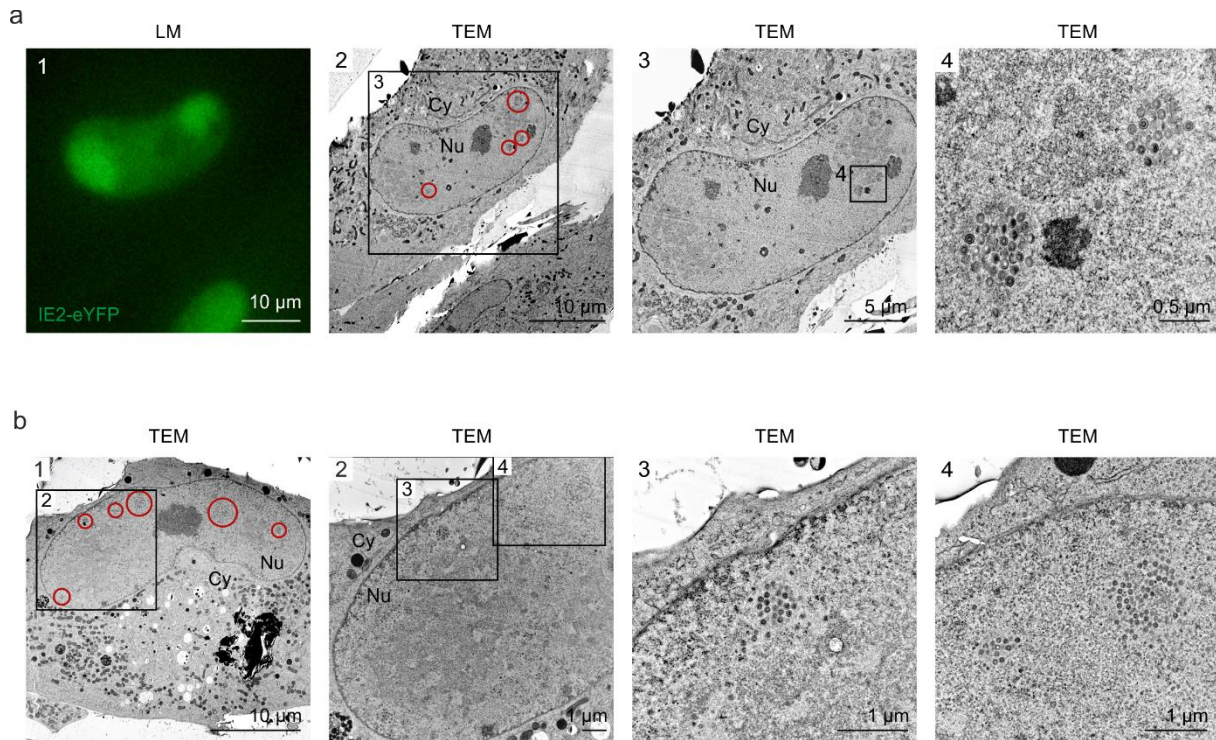

**Supplementary Figure 6. Clustering of viral capsids in HCMV $\Delta$ IE1-infected cell nuclei.**

(a) For CLEM analysis, HFF cells on carbon-patterned sapphire discs were infected with a TB40E-based recombinant HCMV lacking IE1 and encoding IE2-eYFP at a high MOI (MOI > 30). 6 days after infection, cells were imaged by fluorescence microscopy (LM) and subsequently analyzed by TEM. Red circles in panel 2 indicate HCMV capsid accumulations in the cell nucleus. (b) HFF cells on sapphire disks were infected HCMV deleted for IE1, based on strain AD169 (MOI of 10). 6 days after infection, cells were subjected to EM sample preparation and subsequently analyzed by TEM. Red circles in panel 1 indicate HCMV capsid accumulations in the cell nucleus. LM, light microscopy; TEM, transmission electron microscopy; Nu, nucleus; Cy, cytoplasm.

**Video 1. Formation of PML cages after infection with HCMV-IE1-L174P.** 3D reconstruction of a cell nucleus after infection with HCMV-IE1-L174P and immunofluorescence staining as described in Fig. 1a. The cell nucleus is shown in blue, PML cages in red, and viral replication centers in green.

**Video 2. FIB-SEM tomography showing HCMV capsid entrapment by PML cages.** FIB-SEM tomography was applied to analyze three volumes within a mCherry-PML expressing cell that was infected with HCMV $\Delta$ IE1-IE2eYFP as described in Fig. 7d. All regions had the same dimensions (5  $\mu$ m in z direction) resulting in datasets of 250 subsequent slices with an increment of 20 nm, which were selected and assembled with ImageJ.

**Video 3. 3D reconstruction of a PML cage containing HCMV capsids.** 3D reconstruction of a PML cage within a cell nucleus infected with HCMV $\Delta$ IE1-IE2eYFP (see Fig. 7d and e, panel c). FIB-SEM images containing the PML cage were assembled and cropped using ImageJ, aligned with IMOD, and segmented in Avizo. HCMV capsids are shown in green, the PML envelope is shown in transparent red.

## Supplementary Table 1

| SiRNA target sequences                                             |                                                                                 |
|--------------------------------------------------------------------|---------------------------------------------------------------------------------|
| siPML2                                                             | AGATGCAGCTGTATCCAAG                                                             |
| siSp100                                                            | GGAAGCACTGTTTCAGCGATGT                                                          |
| siDaxx1                                                            | GGAGTTGGATCTCTCAGAA                                                             |
| siATRX                                                             | GAGGAAACCTTCAATTGTA                                                             |
| siC                                                                | GTGCGTTGCTAGTACCAAC)                                                            |
| Oligonucleotides for cloning of mCherry-PML into pInducer20-CRSmut |                                                                                 |
| c-CRS-mut                                                          | GCGTGTACGGTGGGAGGCCTATATAAGCAGAGCCTAGGTA<br>GGGAGAAGTCAGATCGCCTGGAGACGCC        |
| nc-CRS-mut                                                         | GGCGTCTCCAGGCGATCTGACTTCTCCCTACCTAGGCTCTG<br>CTTATATAGGCCCTCCACCGTACACGC        |
| 5'-attB1-mCherry                                                   | GGGGACAAGTTTGTACAAAAAAGCAGGCTATGGTGAGCAA<br>GGGCGAGGA                           |
| 3' attB2-PMLVI                                                     | GGGGACCACTTTGTACAAGAAAGCTGGGTTCACCACAACG<br>CGTTCCTCT                           |
| Oligonucleotides for generation of recombinant HCMV                |                                                                                 |
| 5' Intron3/pKD13                                                   | AAAGATGTCCTGGCAGAACTCGGTAAGTCTGTTGACATGTA<br>TGTGATGTAGTGTAGGCTGGAGCTGCTTC      |
| 3' Exon 4/pkd13                                                    | TAGTTTACTGGTCAGCCTTGCTTCTAGTCACCATAGGGTGG<br>GTGCTCTTGATTCCGGGGATCCGTCGACC      |
| IE2-eYFP-forw                                                      | TGAGCCTGGCCATCGAGGCAGCCATCCAGGACCTGAGGAA<br>CAAGTCTCAG ATGGTGAGCAAGGGCGAGGAGCTG |
| IE2-eYFP-rev                                                       | GGGGAATCACTATGTACAAGAGTCCATGTCTCTTTCCAGTT<br>TTTCACTTACTTGTACAGCTCGTCCATGCCGAG  |
| Primers and hydrolysis probes for real-time PCR                    |                                                                                 |
| 5'gB_forw                                                          | CTGCGTGATATGAACGTGAAGG                                                          |
| 3'gB_rev                                                           | ACTGCACGTACGAGCTGTTGG                                                           |
| CMV gB<br>FAM/TAMRA                                                | FAM-CGCCAGGACGCTGCTACTCACGA-TAMRA                                               |
| 5'Alb                                                              | GTGAACAGGCGACCATGCT                                                             |
| 3'Alb                                                              | GCATGGAAGGTGAATGTTTCAG                                                          |
| Alb FAM/TAMRA                                                      | FAM-TCAGCTCTGGAAGTCGATGAAACATACGTTT-TAMRA                                       |
